# Supplementary material for: Tbx1 Heterozygosity in the Oligodendrocyte Lineage Shifts Myelinated Axon Composition in the Mouse Fimbria Without Behavioral Impairments
Source: Research Square preprint supplement (doi:10.21203/rs.3.rs-9327970/v1), 2026-04-19
Supplement: Supplementary file 1 [file 82ef2cb1f34bdeb4b5252c3f.docx]

**Supplementary Information**


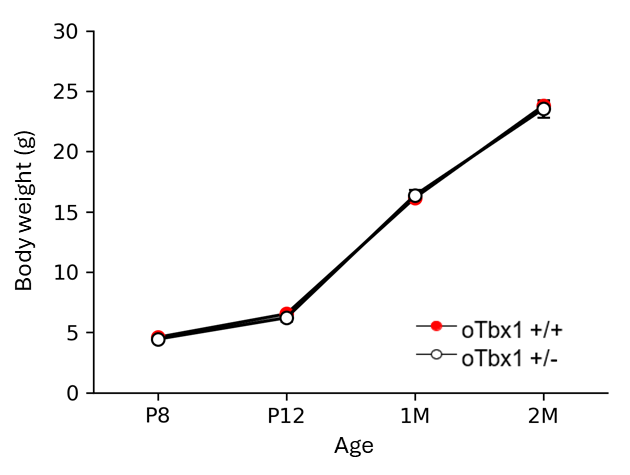


**Figure** **S1.** Body weights o*Tbx1*+/+ and o*Tbx1*+/− mice. o*Tbx1*+/+ and o*Tbx1*+/− mice had indistinguishable body weight increases from P8 to 2 months of age (P8, U = 140, p = 0.800; P12, U = 153, p = 0.466; 1 month, U = 135.5, p = 0.7035; 2 months, U = 102, p = 0.917). o*Tbx1*+/+ P8, N = 27, P12; N = 30; 1M, 1 month, N = 27; 2M, 2 months, N = 21: o*Tbx1*+/−: P8, N = 11, P12, N = 12; 1M, N = 11; 2M, N = 10.

**
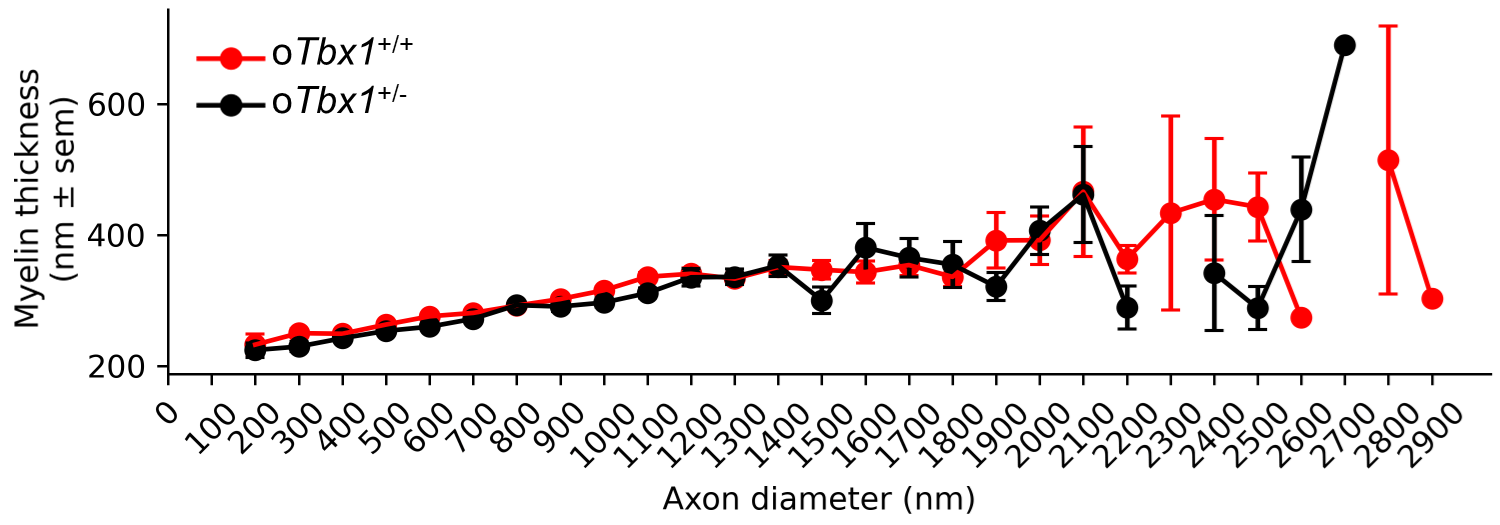
Supplementary Figure S2.** The myelin thickness of axons for o*Tbx1*+/− versus o*Tbx1*+/+ mice versus axon diameter was similar along the axon diameter range (genotype, p = 0.931; genotype × axon diameter, p = 0.814).
