# Supplementary material for: Tbx1 Heterozygosity in the Oligodendrocyte Lineage Shifts Myelinated Axon Composition in the Mouse Fimbria Without Behavioral Impairments
Source: Research Square preprint supplement (doi:10.21203/rs.3.rs-9327970/v1), 2026-04-19
Supplement: Supplementary file 2 [file b9a44424808da2c08632495b.pdf]

| Figure   | Control Gene  | Gene          | Treatment     | # of Samples | Average     | s.e.m       | Shapiro-Wilk Test |             |                |                | Levene's Test |             |                |                | Linear Mixed Model                                       |             |               |               | Mann Whitney U Test |               |             |             |             |             |                |                |
|----------|---------------|---------------|---------------|--------------|-------------|-------------|-------------------|-------------|----------------|----------------|---------------|-------------|----------------|----------------|----------------------------------------------------------|-------------|---------------|---------------|---------------------|---------------|-------------|-------------|-------------|-------------|----------------|----------------|
|          |               |               |               |              |             |             | Statistic         | p_value     | p_adj (FDR BH) | Reject (FDR5%) | Statistic     | p_value     | p_adj (FDR BH) | Reject (FDR5%) | Source                                                   | F           | df1           | df2           | Sig.                | Sample 1      | Sample 2    | Statistic   | R (Z score) | p_value     | p_adj (FDR BH) | Reject (FDR5%) |
| Figure 1 | Pkg1          | Tbx1          | control siRNA | 6            | 1           | 0.049186162 | 0.93572346        | 0.624966577 | 0.805579616    | FALSE          | 1.758766194   | 0.21744683  | 0.297607562    | FALSE          | Corrected Model<br>Gene<br>Treatment<br>Gene * Treatment | 2.006348255 | 11            | 89            | 0.03681448          | control siRNA | Tbx1 siRNA  | 7           | 0.50847518  | 0.008658009 | 0.012987013    | TRUE           |
|          |               |               | Tbx1 siRNA    | 5            | 0.464725499 | 0.116052639 | 0.932068851       | 0.610545167 | 0.805579616    | FALSE          | 0.843979959   | 5           | 89             | 0.52216149     |                                                          |             |               |               |                     |               |             |             |             |             |                |                |
|          |               | Cspg4         | control siRNA | 9            | 1           | 0.066746189 | 0.960660226       | 0.805205712 | 0.878406231    | FALSE          | 1.522725608   | 0.235026707 | 0.297607562    | FALSE          |                                                          | 14.66501979 | 1             | 89            | 0.00023857          | control siRNA | Tbx1 siRNA  | 8           | 0.676423086 | 0.002756067 | 0.008268202    | TRUE           |
|          |               |               | Tbx1 siRNA    | 9            | 0.685034037 | 0.037803054 | 0.980712867       | 0.967840714 | 0.967840714    | FALSE          | 0.843979957   | 5           | 89             | 0.522161492    |                                                          |             |               |               |                     |               |             |             |             |             |                |                |
|          |               | MAG           | control siRNA | 9            | 1           | 0.041029197 | 0.908420558       | 0.304976014 | 0.731942433    | FALSE          | 3.473378198   | 0.080821307 | 0.297607562    | FALSE          |                                                          |             |               |               |                     | control siRNA | Tbx1 siRNA  | 11          | 0.613984032 | 0.007774578 | 0.012987013    | TRUE           |
|          |               |               | Tbx1 siRNA    | 9            | 0.670998004 | 0.157173093 | 0.903392871       | 0.272326671 | 0.731942433    | FALSE          |               |             |                |                |                                                          |             |               |               |                     |               |             |             |             |             |                |                |
|          |               | MBP           | control siRNA | 9            | 1           | 0.056959774 | 0.921773656       | 0.40712653  | 0.805579616    | FALSE          | 0.679262555   | 0.421957432 | 0.421957432    | FALSE          |                                                          |             |               |               |                     | control siRNA | Tbx1 siRNA  | 6           | 0.718049122 | 0.00123406  | 0.00740436     | TRUE           |
|          | Tbx1 siRNA    |               | 9             | 0.553891554  | 0.084308916 | 0.872112121 | 0.129519549       | 0.518078195 | FALSE          |                |               |             |                |                |                                                          |             |               |               |                     |               |             |             |             |             |                |                |
|          | MOG           | control siRNA | 9             | 1            | 0.064281655 | 0.948291674 | 0.671316347       | 0.805579616 | FALSE          | 1.89729647     | 0.18734571    | 0.297607562 | FALSE          |                |                                                          |             |               | control siRNA | Tbx1 siRNA          | 14            | 0.551544978 | 0.018757713 | 0.018757713 | TRUE        |                |                |
|          |               | Tbx1 siRNA    | 9             | 0.60385684   | 0.126671201 | 0.85412067  | 0.082708168       | 0.496249006 | FALSE          |                |               |             |                |                |                                                          |             |               |               |                     |               |             |             |             |             |                |                |
|          | Plp1          | control siRNA | 9             | 1            | 0.06060843  | 0.939293908 | 0.574485759       | 0.805579616 | FALSE          | 1.437463429    | 0.248006301   | 0.297607562 | FALSE          |                |                                                          |             |               | control siRNA | Tbx1 siRNA          | 14            | 0.551544978 | 0.018757713 | 0.018757713 | TRUE        |                |                |
|          |               | Tbx1 siRNA    | 9             | 0.700871358  | 0.116118855 | 0.84502056  | 0.065659769       | 0.496249006 | FALSE          |                |               |             |                |                |                                                          |             |               |               |                     |               |             |             |             |             |                |                |
|          | 18S           | Tbx1          | control siRNA | 6            | 1           | 0.078568382 | 0.92617953        | 0.550937859 | 0.734583812    | FALSE          | 0.009347636   | 0.925096749 | 0.925096749    | FALSE          | Corrected Model<br>Gene<br>Treatment<br>Gene * Treatment | 2.450555968 | 11            | 89            | 0.010091634         | control siRNA | Tbx1 siRNA  | 6           | 0.554700196 | 0.004329004 | 0.007774578    | TRUE           |
|          |               |               | Tbx1 siRNA    | 5            | 0.440976588 | 0.066877094 | 0.97650378        | 0.915107555 | 0.915107555    | FALSE          | 1.101427491   | 5           | 89             | 0.365404553    |                                                          |             |               |               |                     |               |             |             |             |             |                |                |
| Cspg4    |               | control siRNA | 9             | 1            | 0.044646855 | 0.916096471 | 0.360902781       | 0.662239178 | FALSE          | 0.016880314    | 0.898245734   | 0.925096749 | FALSE          | 17.51187144    |                                                          | 1           | 89            | 6.68502E-05   | control siRNA       | Tbx1 siRNA    | 4           | 0.759675158 | 0.000493624 | 0.002961744 | TRUE           |                |
|          |               | Tbx1 siRNA    | 9             | 0.687687722  | 0.045939538 | 0.919279302 | 0.386306187       | 0.662239178 | FALSE          | 1.101427494    | 5             | 89          | 0.365404552    |                |                                                          |             |               |               |                     |               |             |             |             |             |                |                |
| MAG      |               | control siRNA | 9             | 1            | 0.055152176 | 0.966495138 | 0.863205301       | 0.915107555 | FALSE          | 1.450912436    | 0.24589768    | 0.643468053 | FALSE          |                |                                                          |             |               |               | control siRNA       | Tbx1 siRNA    | 11          | 0.613984032 | 0.007774578 | 0.007774578 | TRUE           |                |
|          |               | Tbx1 siRNA    | 9             | 0.642342516  | 0.157925591 | 0.844966625 | 0.065569561       | 0.242978818 | FALSE          |                |               |             |                |                |                                                          |             |               |               |                     |               |             |             |             |             |                |                |
| MBP      |               | control siRNA | 9             | 1            | 0.053726606 | 0.931315789 | 0.493974756       | 0.734583812 | FALSE          | 0.206705208    | 0.655469861   | 0.925096749 | FALSE          |                |                                                          |             |               |               | control siRNA       | Tbx1 siRNA    | 7           | 0.697236104 | 0.00185109  | 0.00555327  | TRUE           |                |
|          | Tbx1 siRNA    | 9             | 0.544403139   | 0.082596116  | 0.85329064  | 0.080992939 | 0.242978818       | FALSE       |                |                |               |             |                |                |                                                          |             |               |               |                     |               |             |             |             |             |                |                |
| MOG      | control siRNA | 9             | 1             | 0.06650766   | 0.957538993 | 0.772242353 | 0.915107555       | FALSE       | 1.178141059    | 0.293818671    | 0.643468053   | FALSE       |                |                |                                                          |             | control siRNA | Tbx1 siRNA    | 11                  | 0.613984032   | 0.007774578 | 0.007774578 | TRUE        |             |                |                |
|          | Tbx1 siRNA    | 9             | 0.588913841   | 0.123648773  | 0.841639086 | 0.060228776 | 0.242978818       | FALSE       |                |                |               |             |                |                |                                                          |             |               |               |                     |               |             |             |             |             |                |                |
| Plp1     | control siRNA | 9             | 1             | 0.04046838   | 0.874188469 | 0.136290611 | 0.327097466       | FALSE       | 1.045606567    | 0.321734027    | 0.643468053   | FALSE       |                |                |                                                          |             | control siRNA | Tbx1 siRNA    | 11                  | 0.613984032   | 0.007774578 | 0.007774578 | TRUE        |             |                |                |
|          | Tbx1 siRNA    | 9             | 0.692323814   | 0.117369849  | 0.755073552 | 0.00620775  | 0.074492996       | FALSE       |                |                |               |             |                |                |                                                          |             |               |               |                     |               |             |             |             |             |                |                |

| Figure 4A | Measurement | Call type | PND | Genotype | # of Samples | Average     | s.e.m       | Shapiro-Wilk test |             |               |                 | Levene test |     |     |             | Linear Mixed Model |                 |                            |             | Mann-Whitney U test |     |              |          |          |           |             |             |               |                 |
|-----------|-------------|-----------|-----|----------|--------------|-------------|-------------|-------------------|-------------|---------------|-----------------|-------------|-----|-----|-------------|--------------------|-----------------|----------------------------|-------------|---------------------|-----|--------------|----------|----------|-----------|-------------|-------------|---------------|-----------------|
|           |             |           |     |          |              |             |             | Statistic         | p_value     | p_adj(FDR BH) | Rejects(FDR 5%) | Statistic   | df1 | df2 | p_value     | p_adj(FDR BH)      | Rejects(FDR 5%) | Source                     | F           | df1                 | df2 | Sig.         | Sample1  | Sample2  | Statistic | R (Z score) | p_value     | p_adj(FDR BH) | Rejects(FDR 5%) |
| Figure 4A | Harmonics   | P8        | PND | oTbx1+/- | 27           | 25.44444444 | 6.455928465 | 0.734571278       | 1.2196E-05  | 0.25425E-05   | TRUE            | 0.588767426 | 1   | 36  | 0.447899604 | 0.866000524        | FALSE           | Corrected Model            | 6.94053254  | 47                  | 912 | 0            | oTbx1+/- | oTbx1+/- | 139       | 0.049603452 | 0.775387862 | 0.990742675   | FALSE           |
|           |             |           |     |          | 11           | 18          | 5.412107639 | 0.869194567       | 0.075694919 | 0.082576275   | FALSE           | 0.080099472 | 1   | 40  | 0.778622211 | 0.866000524        | FALSE           | Genotype                   | 0.196622137 | 1                   | 912 | 0.657366557  | oTbx1+/- | oTbx1+/- | 180       | 0           | 1           | 1             | FALSE           |
|           |             |           |     |          | 30           | 18.53333333 | 4.41620145  | 0.769232988       | 1.89257E-05 | 6.33374E-05   | TRUE            | 0.588478181 | 1   | 36  | 0.448010251 | 0.866000524        | FALSE           | Genotype * PND             | 6.147480911 | 1                   | 912 | 0.0128134731 | oTbx1+/- | oTbx1+/- | 140       | 0.044382036 | 0.799797921 | 0.990742675   | FALSE           |
|           |             |           |     |          | 12           | 17.41666667 | 6.962516888 | 0.741135657       | 0.002162845 | 0.002883793   | TRUE            | 0.194362482 | 1   | 40  | 0.661683974 | 0.866000524        | FALSE           | PND * Call type            | 19.63969375 | 11                  | 912 | 0            | oTbx1+/- | oTbx1+/- | 174       | 0.025776963 | 0.879981095 | 0.990742675   | FALSE           |
|           |             |           |     |          | 27           | 1.518518519 | 0.424902772 | 0.641833842       | 6.62769E-07 | 2.65108E-06   | TRUE            | 0.588478181 | 1   | 36  | 0.448010251 | 0.866000524        | FALSE           | Genotype * PND             | 4.835206967 | 11                  | 912 | 0.028134731  | oTbx1+/- | oTbx1+/- | 140       | 0.044382036 | 0.799797921 | 0.990742675   | FALSE           |
|           |             |           |     |          | 11           | 1           | 0.301511345 | 0.863411665       | 0.063748829 | 0.071161484   | FALSE           | 0.194362482 | 1   | 40  | 0.661683974 | 0.866000524        | FALSE           | PND * Call type            | 1.728524601 | 11                  | 912 | 0.062712426  | oTbx1+/- | oTbx1+/- | 174       | 0.025776963 | 0.879981095 | 0.990742675   | FALSE           |
|           |             |           |     |          | 30           | 3.866666667 | 1.062131162 | 0.71998024        | 3.08876E-06 | 8.23669E-06   | TRUE            | 0.588478181 | 1   | 36  | 0.448010251 | 0.866000524        | FALSE           | Genotype * PND * Call type | 0.366631844 | 11                  | 912 | 0.967949606  | oTbx1+/- | oTbx1+/- | 121       | 0.14358894  | 0.390490444 | 0.990742675   | FALSE           |
|           |             |           |     |          | 12           | 1.666666667 | 1.953370565 | 0.517821491       | 2.3982E-05  | 4.42745E-05   | TRUE            | 0.194362482 | 1   | 40  | 0.661683974 | 0.866000524        | FALSE           | Genotype * PND * Call type | 0.366631844 | 11                  | 912 | 0.967949606  | oTbx1+/- | oTbx1+/- | 121       | 0.14358894  | 0.390490444 | 0.990742675   | FALSE           |
|           |             |           |     |          | 27           | 19.92592593 | 3.665472193 | 0.834571779       | 0.000578805 | 0.000817137   | TRUE            | 0.588478181 | 1   | 36  | 0.448010251 | 0.866000524        | FALSE           | Genotype * PND * Call type | 0.366631844 | 11                  | 912 | 0.967949606  | oTbx1+/- | oTbx1+/- | 121       | 0.14358894  | 0.390490444 | 0.990742675   | FALSE           |
|           |             |           |     |          | 11           | 12.27272727 | 2.157822594 | 0.916108012       | 0.287544787 | 0.287544787   | FALSE           | 0.194362482 | 1   | 40  | 0.661683974 | 0.866000524        | FALSE           | Genotype * PND * Call type | 0.366631844 | 11                  | 912 | 0.967949606  | oTbx1+/- | oTbx1+/- | 121       | 0.14358894  | 0.390490444 | 0.990742675   | FALSE           |
|           |             |           |     |          | 30           | 27.53333333 | 5.654971027 | 0.831702948       | 0.000262676 | 0.000394014   | TRUE            | 0.588478181 | 1   | 36  | 0.448010251 | 0.866000524        | FALSE           | Genotype * PND * Call type | 0.366631844 | 11                  | 912 | 0.967949606  | oTbx1+/- | oTbx1+/- | 121       | 0.14358894  | 0.390490444 | 0.990742675   | FALSE           |
|           |             |           |     |          | 12           | 25.91666667 | 6.770544866 | 0.88340597        | 0.096735299 | 0.098793496   | FALSE           | 0.194362482 | 1   | 40  | 0.661683974 | 0.866000524        | FALSE           | Genotype * PND * Call type | 0.366631844 | 11                  | 912 | 0.967949606  | oTbx1+/- | oTbx1+/- | 121       | 0.14358894  | 0.390490444 | 0.990742675   | FALSE           |

| Figure 4A | Measurement | Call type | PND | Genotype | # of Samples | Average     | s.e.m       | Shapiro-Wilk test |             |               |                 | Levene test |     |     |             | Linear Mixed Model |                 |                 |             | Mann-Whitney U test |     |             |          |          |           |              |             |               |                 |
|-----------|-------------|-----------|-----|----------|--------------|-------------|-------------|-------------------|-------------|---------------|-----------------|-------------|-----|-----|-------------|--------------------|-----------------|-----------------|-------------|---------------------|-----|-------------|----------|----------|-----------|--------------|-------------|---------------|-----------------|
|           |             |           |     |          |              |             |             | Statistic         | p_value     | p_adj(FDR BH) | Rejects(FDR 5%) | Statistic   | df1 | df2 | p_value     | p_adj(FDR BH)      | Rejects(FDR 5%) | Source          | F           | df1                 | df2 | Sig.        | Sample1  | Sample2  | Statistic | R (Z score)  | p_value     | p_adj(FDR BH) | Rejects(FDR 5%) |
| Figure 4A | Harmonics   | P8        | PND | oTbx1+/- | 27           | 126.7777778 | 26.50132144 | 0.7854976         | 7.77043E-05 | 0.000157208   | TRUE            | 1.121799982 | 1   | 36  | 0.295686227 | 0.593172454        | FALSE           | Corrected Model | 0.636064898 | 3                   | 76  | 0.59407046  | oTbx1+/- | oTbx1+/- | 126.5     | -0.14871152  | 0.504762746 | 0.73135923    | FALSE           |
|           |             |           |     |          | 11           | 85.54545455 | 23.66407467 | 0.834964693       | 0.027126787 | 0.027126787   | TRUE            | 0.000269074 | 1   | 40  | 0.98699405  | 0.98699405         | FALSE           | Genotype        | 0.155970557 | 1                   | 76  | 0.693999976 | oTbx1+/- | oTbx1+/- | 166.5     | -0.057998167 | 0.73135923  | 0.73135923    | FALSE           |
|           |             |           |     |          | 30           | 130.6       | 27.57400075 | 0.804300725       | 7.86042E-05 | 0.000157208   | TRUE            | 0.000269074 | 1   | 40  | 0.98699405  | 0.98699405         | FALSE           | PND             | 1.419833311 | 1                   | 76  | 0.237138636 | oTbx1+/- | oTbx1+/- | 166.5     | -0.057998167 | 0.73135923  | 0.73135923    | FALSE           |
|           |             |           |     |          | 12           | 143.3333333 | 45.18922058 | 0.79983592        | 0.09328736  | 0.012438315   | TRUE            | 0.000269074 | 1   | 40  | 0.98699405  | 0.98699405         | FALSE           | Genotype * PND  | 1.103292412 | 1                   | 76  | 0.296873255 | oTbx1+/- | oTbx1+/- | 166.5     | -0.057998167 | 0.73135923  | 0.73135923    | FALSE           |

| Measurement | Call type | PND | Genotype | # of samples | Average   | s.e.m       | Shapiro-Wilk test |             |               |                 | Levene's test |             |             |             | Generalized Linear Mixed Model |                 |        |                            | Mann-Whitney's U test |             |          |                            |                   |            |             |                   |                   |                 |              |              |             |             |       |       |
|-------------|-----------|-----|----------|--------------|-----------|-------------|-------------------|-------------|---------------|-----------------|---------------|-------------|-------------|-------------|--------------------------------|-----------------|--------|----------------------------|-----------------------|-------------|----------|----------------------------|-------------------|------------|-------------|-------------------|-------------------|-----------------|--------------|--------------|-------------|-------------|-------|-------|
|             |           |     |          |              |           |             | Statistic         | p_value     | p_adj(FDR BH) | Rejects(FDR 5%) | Statistic     | df1         | df2         | p_value     | p_adj(FDR BH)                  | Rejects(FDR 5%) | Source | F                          | df1                   | df2         | Sig.     | Sample1                    | Sample2           | Statistic  | R (Z score) | p_value           | p_adj(FDR BH)     | Rejects(FDR 5%) |              |              |             |             |       |       |
| Figure 4A   | Harmonics | P8  | PND      | oTbx1+/-     | 8         | 9.625       | 2.672194791       | 0.919298375 | 0.42419617    | 0.449148886     | FALSE         | 1.65961678  | 2           | 24          | 0.211306457                    | 0.559313096     | FALSE  | Corrected Model            | 4.565593657           | 71          | 612      | 0                          | PdGfraCre;Tbx1+/- | WT;Tbx1+/- | 28.5        | 0.019833333       | 0.798445998       | 0.974374778     | FALSE        |              |             |             |       |       |
|             |           |     |          |              | 8         | 18.125      | 11.96786993       | 0.59934529  | 0.000156224   | 0.000749877     | TRUE          | 1.65961678  | 2           | 24          | 0.211306457                    | 0.559313096     | FALSE  | Genotype                   | 2.526849017           | 2           | 612      | 0.080743877                | PdGfraCre;Tbx1+/- | WT;Tbx1+/- | 15.5        | -0.539886352      | 0.02034876        | 0.488370247     | FALSE        |              |             |             |       |       |
|             |           |     |          |              | 11        | 4.227272727 | 11.79066727       | 0.863657084 | 0.064216294   | 0.087237229     | FALSE         | 1.65961678  | 2           | 24          | 0.211306457                    | 0.559313096     | FALSE  | PND                        | 0.381377322           | 1           | 612      | 0.537096747                | PdGfraCre;Tbx1+/- | WT;Tbx1+/- | 19          | -0.47354519       | 0.04088275        | 0.644874038     | FALSE        |              |             |             |       |       |
|             |           |     |          |              | 9         | 11.22222222 | 7.025306988       | 0.600651882 | 9.73774E-05   | 0.000539321     | TRUE          | 1.65961678  | 2           | 24          | 0.211306457                    | 0.559313096     | FALSE  | Genotype * PND             | 18.61506323           | 11          | 612      | 0                          | PdGfraCre;Tbx1+/- | WT;Tbx1+/- | 40          | -0.010406509      | 0.959129759       | 1               | 1            | FALSE        |             |             |       |       |
|             |           |     |          |              | 9         | 11.66666667 | 5.525194818       | 0.765487459 | 0.008192575   | 0.016093411     | TRUE          | 1.65961678  | 2           | 24          | 0.211306457                    | 0.559313096     | FALSE  | Genotype * PND * Call type | 1.47748124            | 57          | 612      | 0.015666306                | PdGfraCre;Tbx1+/- | WT;Tbx1+/- | 32.5        | -0.333423509      | 0.147939986       | 0.644874038     | FALSE        |              |             |             |       |       |
|             |           |     |          |              | 12        | 29.16666667 | 8.23946095        | 0.864345385 | 0.05433248    | 0.076753728     | FALSE         | 1.65961678  | 2           | 24          | 0.211306457                    | 0.559313096     | FALSE  | Genotype * PND * Call type | 1.47748124            | 57          | 612      | 0.015666306                | PdGfraCre;Tbx1+/- | WT;Tbx1+/- | 35          | -0.294651333      | 0.193005137       | 0.644874038     | FALSE        |              |             |             |       |       |
|             |           |     |          |              | step_down | P8          | PND               | oTbx1+/-    | 8             | 0.875           | 0.295044822   | 0.835213557 | 0.067235943 | 0.0894779   | FALSE                          | 1.361546454     | 2      | 24                         | 0.275358008           | 0.559313096 | FALSE    | Genotype                   | 4.565593657       | 71         | 612         | 0                 | PdGfraCre;Tbx1+/- | WT;Tbx1+/-      | 31           | -0.026255252 | 0.959129759 | 1           | 1     | FALSE |
|             |           |     |          |              |           |             |                   |             | 8             | 1               | 0.377964479   | 0.859949135 | 0.119934837 | 0.146361157 | FALSE                          | 1.361546454     | 2      | 24                         | 0.275358008           | 0.559313096 | FALSE    | Genotype                   | 4.565593657       | 71         | 612         | 0                 | PdGfraCre;Tbx1+/- | WT;Tbx1+/-      | 34.5         | -0.179962117 | 0.49202191  | 0.906204631 | FALSE |       |
|             |           |     |          |              |           |             |                   |             | 11            | 2.363636364     | 0.956059405   | 0.720871942 | 0.00089463  | 0.00254053  | TRUE                           | 1.361546454     | 2      | 24                         | 0.275358008           | 0.559313096 | FALSE    | PND                        | 0.381377322       | 1          | 612         | 0.537096747       | PdGfraCre;Tbx1+/- | WT;Tbx1+/-      | 35           | -0.161018736 | 0.544759334 | 0.906204631 | FALSE |       |
|             |           |     |          |              |           |             |                   |             | 9             | 0.888888889     | 0.611111111   | 0.570366604 | 4.29426E-05 | 0.000281079 | TRUE                           | 1.361546454     | 2      | 24                         | 0.275358008           | 0.559313096 | FALSE    | Genotype * PND             | 18.61506323       | 11         | 612         | 0                 | PdGfraCre;Tbx1+/- | WT;Tbx1+/-      | 28.5         | -0.29132252  | 0.258950993 | 0.743019943 | FALSE |       |
|             |           |     |          |              |           |             |                   |             | 9             | 5.111111111     | 2.4793679     | 0.695460931 | 0.001254342 | 0.003473563 | FALSE                          | 1.361546454     | 2      | 24                         | 0.275358008           | 0.559313096 | FALSE    | Genotype * PND * Call type | 1.47748124        | 57         | 612         | 0.015666306       | PdGfraCre;Tbx1+/- | WT;Tbx1+/-      | 26.5         | -0.42647193  | 0.058483312 | 0.444874038 | FALSE |       |
|             |           |     |          |              |           |             |                   |             | 12            | 15.66666667     | 1.56589781    | 0.8638356   | 0.054652247 | 0.076753728 | FALSE                          | 1.361546454     | 2      | 24                         | 0.275358008           | 0.559313096 | FALSE    | Genotype * PND * Call type | 1.47748124        | 57         | 612         | 0.015666306       | PdGfraCre;Tbx1+/- | WT;Tbx1+/-      | 47.5         | -0.100820456 | 0.70208531  | 0.939137333 | FALSE |       |
| short       | P8        | PND | oTbx1+/- | 8            |           |             |                   |             | 15.125        | 4.834539053     | 0.86744039    | 0.14278889  | 0.16527097  | FALSE       | 1.622768353                    | 2               | 24     | 0.218268212                | 0.559313096           | FALSE       | Genotype | 4.565593657                | 71                | 612        | 0           | PdGfraCre;Tbx1+/- | WT;Tbx1+/-        | 30.5            | -0.339328277 | 0.959129759  | 1           | 1           | FALSE |       |
|             |           |     |          | 8            |           |             |                   |             | 13.25         | 4.087218754     | 0.849020808   | 0.093116392 | 0.117620706 | FALSE       | 1.622768353                    | 2               | 24     | 0.218268212                | 0.559313096           | FALSE       | Genotype | 4.565593657                | 71                | 612        | 0           | PdGfraCre;Tbx1+/- | WT;Tbx1+/-        | 27              | -0.322037473 | 0.177370273  | 0.644874038 | FALSE       |       |       |
|             |           |     |          | 11           |           |             |                   |             | 28.27272727   | 7.311374587     | 0.875466193   | 0.091090759 | 0.11711669  | FALSE       | 1.622768353                    | 2               | 24     | 0.218268212                | 0.559313096           | FALSE       | Genotype | 4.565593657                | 71                | 612        | 0           | PdGfraCre;Tbx1+/- | WT;Tbx1+/-        | 27.5            | -0.312565783 | 0.206001429  | 0.644874038 | FALSE       |       |       |
|             |           |     |          | 9            |           |             |                   |             | 13            | 3.905124838     | 0.914834887   | 0.351194856 | 0.383121661 | FALSE       | 1.622768353                    | 2               | 24     | 0.218268212                | 0.559313096           | FALSE       | Genotype | 4.565593657                | 71                | 612        | 0           | PdGfraCre;Tbx1+/- | WT;Tbx1+/-        | 33.5            | -0.145691126 | 0.604812834  | 0.926521789 | FALSE       |       |       |
|             |           |     |          | 9            |           |             |                   |             | 33.33333333   | 13.89844116     | 0.807207052   | 0.04673587  | 0.094777739 | TRUE        | 1.622768353                    | 2               | 24     | 0.218268212                | 0.559313096           | FALSE       | Genotype | 4.565593657                | 71                | 612        | 0           | PdGfraCre;Tbx1+/- | WT;Tbx1+/-        | 34              | -0.10161403  | 0.169421291  | 0.644874038 | FALSE       |       |       |
|             |           |     |          | 12           |           |             |                   |             | 34.08333333   | 8.745958663     | 0.90909298    | 0.207195733 | 0.22959012  | FALSE       | 1.622768353                    | 2               | 24     | 0.218268212                | 0.5                   |             |          |                            |                   |            |             |                   |                   |                 |              |              |             |             |       |       |

| Figure    | Measurement | Call type | PND      | Genotype | # of Samples | Average     | s.e.m       | Shapiro-Wilk test |             |               |                 |             | Levene test |             |             |               |                 | Linear Mixed Model |                            |             |     |             | Mann-Whitney U test |          |           |              |             |               |                 |       |  |  |  |
|-----------|-------------|-----------|----------|----------|--------------|-------------|-------------|-------------------|-------------|---------------|-----------------|-------------|-------------|-------------|-------------|---------------|-----------------|--------------------|----------------------------|-------------|-----|-------------|---------------------|----------|-----------|--------------|-------------|---------------|-----------------|-------|--|--|--|
|           |             |           |          |          |              |             |             | Statistic         | p_value     | p_adj(FDR BH) | Rejects(FDR 5%) | Statistic   | df1         | df2         | p_value     | p_adj(FDR BH) | Rejects(FDR 5%) | Source             | F                          | df1         | df2 | Sig.        | Sample1             | Sample2  | Statistic | R (Z score)  | p_value     | p_adj(FDR BH) | Rejects(FDR 5%) |       |  |  |  |
| Figure 4B | step_down   | P8        | oTbx1+/+ | oTbx1+/- | 27           | 17.03450018 | 2.203565598 | 0.951793015       | 0.236913264 | 0.27736187    | FALSE           | 0.007209331 | 1           | 36          | 0.932805151 | 0.958177206   | FALSE           | Corrected Model    | 12.69567482                | 47          | 912 | 0.000000000 | oTbx1+/+            | oTbx1+/- | 129       | -0.101817612 | 0.546349031 | 0.974718567   | FALSE           |       |  |  |  |
|           |             |           |          |          | 11           | 19.61154304 | 3.599706317 | 0.960571766       | 0.778805196 | 0.79537552    | FALSE           |             |             |             |             |               |                 |                    |                            |             |     |             |                     |          |           |              |             |               |                 |       |  |  |  |
|           |             |           | P12      | oTbx1+/+ | oTbx1+/-     | 27          | 13.16752619 | 3.364708074       | 0.59169817  | 5.78851E-08   | 3.96926E-07     | TRUE        | 0.873593574 | 1           | 40          | 0.355570832   | 0.948188885     | FALSE              | PND                        | 1.295840311 | 1   | 912         | 0.255273381         | oTbx1+/+ | oTbx1+/-  | 157          | 0.098811692 | 0.536091044   | 0.974718567     | FALSE |  |  |  |
|           |             |           |          |          |              | 12          | 8.505399165 | 1.955013986       | 0.873135149 | 0.07162638    | 0.090475427     | FALSE       |             |             |             |               |                 |                    |                            |             |     |             |                     |          |           |              |             |               |                 |       |  |  |  |
|           |             |           | P8       | oTbx1+/+ | oTbx1+/-     | 27          | 1.336688279 | 0.313639637       | 0.787106931 | 8.25136E-05   | 0.00220036      | TRUE        | 0.149229077 | 1           | 36          | 0.701546982   | 0.958177206     | FALSE              | Call type                  | 39.53182246 | 11  | 912         | 0                   | oTbx1+/+ | oTbx1+/-  | 143.5        | -0.02610708 | 0.899119881   | 0.974718567     | FALSE |  |  |  |
|           |             |           |          |          |              | 11          | 1.573785836 | 0.594457163       | 0.750182659 | 0.002090028   | 0.004180056     | TRUE        |             |             |             |               |                 |                    |                            |             |     |             |                     |          |           |              |             |               |                 |       |  |  |  |
|           |             | P12       | oTbx1+/+ | oTbx1+/- | 30           | 1.789236696 | 0.427419086 | 0.770336628       | 1.97568E-05 | 5.92704E-05   | TRUE            | 2.489159983 | 1           | 40          | 0.122509658 | 0.586275644   | FALSE           | Genotype * PND     | 0.010709424                | 11          | 912 | 0.001369316 | oTbx1+/+            | oTbx1+/- | 176.5     | -0.015036562 | 0.945286072 | 0.974718567   | FALSE           |       |  |  |  |
|           |             |           |          |          | 12           | 9.940976217 | 8.252655216 | 0.398949146       | 3.48338E-06 | 1.28617E-05   | TRUE            |             |             |             |             |               |                 |                    |                            |             |     |             |                     |          |           |              |             |               |                 |       |  |  |  |
|           |             | short     | P8       | oTbx1+/+ | oTbx1+/-     | 27          | 23.44773742 | 4.012502925       | 0.666321874 | 1.3639E-06    | 5.45318E-06     | TRUE        | 0.002788636 | 1           | 36          | 0.958177206   | 0.958177206     | FALSE              | Genotype * PND * Call type | 0.796636894 | 11  | 912         | 0.643654777         | oTbx1+/+ | oTbx1+/-  | 142          | 0.033939204 | 0.849168654   | 0.974718567     | FALSE |  |  |  |
|           |             |           |          |          |              | 11          | 21.62772654 | 4.72041667        | 0.830675006 | 0.023827234   | 0.035740851     | TRUE        |             |             |             |               |                 |                    |                            |             |     |             |                     |          |           |              |             |               |                 |       |  |  |  |
|           |             | P12       | oTbx1+/+ | oTbx1+/- | 30           | 23.23444672 | 2.727284442 | 0.958858669       | 0.289563179 | 0.317734805   | FALSE           | 0.183940001 | 1           | 40          | 0.670309944 | 0.958177206   | FALSE           |                    |                            |             |     |             |                     |          |           |              |             |               |                 |       |  |  |  |
|           |             |           |          |          | 12           | 22.86873026 | 4.926486399 | 0.944190502       | 0.55418241  | 0.578277298   | FALSE           |             |             |             |             |               |                 |                    |                            |             |     |             |                     |          |           |              |             |               |                 |       |  |  |  |
|           |             | down_fm   | P8       | oTbx1+/+ | oTbx1+/-     | 27          | 12.75630401 | 1.76961371        | 0.920927048 | 0.041565027   | 0.058680038     | FALSE       | 4.472020458 | 1           | 36          | 0.041444496   | 0.497333956     | FALSE              |                            |             |     |             |                     |          |           |              |             |               |                 |       |  |  |  |
|           |             |           |          |          |              | 11          | 21.16328548 | 4.9646338         | 0.884678006 | 0.11924167    | 0.146758978     | FALSE       |             |             |             |               |                 |                    |                            |             |     |             |                     |          |           |              |             |               |                 |       |  |  |  |
|           |             | P12       | oTbx1+/+ | oTbx1+/- | 30           | 10.37298456 | 1.542082257 | 0.928056836       | 0.043611676 | 0.059699769   | FALSE           | 0.954744089 | 1           | 40          | 0.334387409 | 0.948188885   | FALSE           |                    |                            |             |     |             |                     |          |           |              |             |               |                 |       |  |  |  |
|           |             |           |          |          | 12           | 13.01185528 | 3.11935555  | 0.931758583       | 0.399125427 | 0.425733789   | FALSE           |             |             |             |             |               |                 |                    |                            |             |     |             |                     |          |           |              |             |               |                 |       |  |  |  |
|           |             | up_fm     | P8       | oTbx1+/+ | oTbx1+/-     | 27          | 13.05872025 | 1.780737559       | 0.92226398  | 0.044774827   | 0.059699769     | FALSE       | 5.242724489 | 1           | 36          | 0.028006319   | 0.497333956     | FALSE              |                            |             |     |             |                     |          |           |              |             |               |                 |       |  |  |  |
|           |             |           |          |          |              | 11          | 6.202009894 | 1.944137346       | 0.855210662 | 0.04989852    | 0.064733215     | FALSE       |             |             |             |               |                 |                    |                            |             |     |             |                     |          |           |              |             |               |                 |       |  |  |  |
|           |             | P12       | oTbx1+/+ | oTbx1+/- | 30           | 17.31720233 | 2.688345341 | 0.892989337       | 0.005683312 | 0.010103665   | TRUE            | 0.013930753 | 1           | 40          | 0.9066357   | 0.958177206   | FALSE           |                    |                            |             |     |             |                     |          |           |              |             |               |                 |       |  |  |  |
|           |             |           |          |          | 12           | 14.90117688 | 3.627231491 | 0.915457904       | 0.250485063 | 0.286268643   | FALSE           |             |             |             |             |               |                 |                    |                            |             |     |             |                     |          |           |              |             |               |                 |       |  |  |  |
|           |             | two_steps | P8       | oTbx1+/+ | oTbx1+/-     | 27          | 1.22818806  | 0.583431602       | 0.439589798 | 4.31981E-09   | 6.9117E-08      | TRUE        | 0.367415161 | 1           | 36          | 0.548219905   | 0.958177206     | FALSE              |                            |             |     |             |                     |          |           |              |             |               |                 |       |  |  |  |
|           |             |           |          |          |              | 11          | 0.657609323 | 0.30689217        | 0.709964395 | 0.000628547   | 0.001436678     | TRUE        |             |             |             |               |                 |                    |                            |             |     |             |                     |          |           |              |             |               |                 |       |  |  |  |
|           |             | P12       | oTbx1+/+ | oTbx1+/- | 30           | 0.376106479 | 0.140892041 | 0.56127277        | 2.53783E-08 | 2.03026E-07   | TRUE            | 0.031791176 | 1           | 40          | 0.859386723 | 0.958177206   | FALSE           |                    |                            |             |     |             |                     |          |           |              |             |               |                 |       |  |  |  |
|           |             |           |          |          | 12           | 0.420168462 | 0.189210931 | 0.706350029       | 0.000970717 | 0.002117929   | TRUE            |             |             |             |             |               |                 |                    |                            |             |     |             |                     |          |           |              |             |               |                 |       |  |  |  |
|           | flat        | P8        | oTbx1+/+ | oTbx1+/- | 27           | 13.18848553 | 1.439854436 | 0.955547333       | 0.291256905 | 0.317734805   | FALSE           | 0.064044466 | 1           | 36          | 0.801653642 | 0.958177206   | FALSE           |                    |                            |             |     |             |                     |          |           |              |             |               |                 |       |  |  |  |
|           |             |           |          |          | 11           | 13.58957049 | 2.677180408 | 0.971073091       | 0.897150159 | 0.897150159   | FALSE           |             |             |             |             |               |                 |                    |                            |             |     |             |                     |          |           |              |             |               |                 |       |  |  |  |
|           | P12         | oTbx1+/+  | oTbx1+/- | 30       | 10.75966512  | 1.248052332 | 0.916827679 | 0.022208858       | 0.03438791  | TRUE          | 0.005399042     | 1           | 40          | 0.941791831 | 0.958177206 | FALSE         |                 |                    |                            |             |     |             |                     |          |           |              |             |               |                 |       |  |  |  |
|           |             |           |          | 12       | 9.627772862  | 1.980798048 | 0.90607655  | 0.189971969       | 0.227966362 | FALSE         |                 |             |             |             |             |               |                 |                    |                            |             |     |             |                     |          |           |              |             |               |                 |       |  |  |  |
|           | chevron     | P8        | oTbx1+/+ | oTbx1+/- | 27           | 11.99601344 | 2.252797934 | 0.893206954       | 0.009383468 | 0.015531257   | TRUE            | 0.562260857 | 1           | 36          | 0.458223333 | 0.958177206   | FALSE           |                    |                            |             |     |             |                     |          |           |              |             |               |                 |       |  |  |  |
|           |             |           |          |          | 11           | 8.606354313 | 3.605578163 | 0.701831937       | 0.000493834 | 0.001185202   | TRUE            |             |             |             |             |               |                 |                    |                            |             |     |             |                     |          |           |              |             |               |                 |       |  |  |  |
|           | P12         | oTbx1+/+  | oTbx1+/- | 30       | 7.944668927  | 1.340965584 | 0.883133352 | 0.0032987         | 0.006147453 | TRUE          | 0.121536249     | 1           | 40          | 0.72920259  | 0.958177206 | FALSE         |                 |                    |                            |             |     |             |                     |          |           |              |             |               |                 |       |  |  |  |
|           |             |           |          | 12       | 5.704118406  | 2.467406    | 0.713398993 | 0.001137725       | 0.002374382 | TRUE          |                 |             |             |             |             |               |                 |                    |                            |             |     |             |                     |          |           |              |             |               |                 |       |  |  |  |
|           | complex     | P8        | oTbx1+/+ | oTbx1+/- | 27           | 1.359067236 | 0.357237975 | 0.747017026       | 1.88041E-05 | 5.92704E-05   | TRUE            | 1.462744932 | 1           | 36          | 0.234376731 | 0.803577363   | FALSE           |                    |                            |             |     |             |                     |          |           |              |             |               |                 |       |  |  |  |
|           |             |           |          |          | 11           | 0.594390633 | 0.456151172 | 0.472920179       | 1.71045E-07 | 4.30227E-06   | TRUE            |             |             |             |             |               |                 |                    |                            |             |     |             |                     |          |           |              |             |               |                 |       |  |  |  |
|           | P12         | oTbx1+/+  | oTbx1+/- | 30       | 1.444040234  | 0.348567383 | 0.776604891 | 5.72732E-05       | 7.13597E-05 | TRUE          | 0.463312445     | 1           | 40          | 0.500001335 | 0.958177206 | FALSE         |                 |                    |                            |             |     |             |                     |          |           |              |             |               |                 |       |  |  |  |
|           |             |           |          | 12       | 2.213403834  | 0.819843897 | 0.755306244 | 0.003037653       | 0.005832293 | TRUE          |                 |             |             |             |             |               |                 |                    |                            |             |     |             |                     |          |           |              |             |               |                 |       |  |  |  |
|           | step_up     | P8        | oTbx1+/+ | oTbx1+/- | 27           | 3.459543469 | 0.754843072 | 0.828750014       | 0.000449811 | 0.001136364   | TRUE            | 2.986552004 | 1           | 36          | 0.092528851 | 0.586275644   | FALSE           |                    |                            |             |     |             |                     |          |           |              |             |               |                 |       |  |  |  |
|           |             |           |          |          | 11           | 6.030970473 | 2.091188206 | 0.792426586       | 0.007478565 | 0.012820397   | TRUE            |             |             |             |             |               |                 |                    |                            |             |     |             |                     |          |           |              |             |               |                 |       |  |  |  |
|           | P12         | oTbx1+/+  | oTbx1+/- | 30       | 2.930012431  | 0.802546816 | 0.690534443 | 1.14398E-06       | 5.26814E-06 | TRUE          | 0.337019135     | 1           | 40          | 0.564811412 | 0.958177206 | FALSE         |                 |                    |                            |             |     |             |                     |          |           |              |             |               |                 |       |  |  |  |
|           |             |           |          | 12       | 2.522648912  | 0.867273801 | 0.814436078 | 0.013736397       | 0.021978235 | TRUE          |                 |             |             |             |             |               |                 |                    |                            |             |     |             |                     |          |           |              |             |               |                 |       |  |  |  |
|           | mult_steps  | P8        | oTbx1+/+ | oTbx1+/- | 27           | 0.053993663 | 0.038446941 | 0.300173998       | 2.61841E-10 | 6.28418E-09   | TRUE            | 0.119494266 | 1           | 36          | 0.731595596 | 0.958177206   | FALSE           |                    |                            |             |     |             |                     |          |           |              |             |               |                 |       |  |  |  |
|           |             |           |          |          | 11           | 0.031897927 | 0.031897927 | 0.344991028       | 2.2434E-08  | 2.03026E-07   | TRUE            |             |             |             |             |               |                 |                    |                            |             |     |             |                     |          |           |              |             |               |                 |       |  |  |  |
|           | P12         | oTbx1+/+  | oTbx1+/- | 30       | 0.016955782  | 0.011903467 | 0.282110274 | 5.00231E-11       | 2.40111E-09 | TRUE          | 0.025753757     | 1           | 40          | 0.873310885 | 0.958177206 | FALSE         |                 |                    |                            |             |     |             |                     |          |           |              |             |               |                 |       |  |  |  |
|           |             |           |          | 12       | 0.026627063  | 0.026627063 | 0.326927483 | 1.20728E-06       | 5.26814E-06 | TRUE          |                 |             |             |             |             |               |                 |                    |                            |             |     |             |                     |          |           |              |             |               |                 |       |  |  |  |
|           | rev_chevron | P8        | oTbx1+/+ | oTbx1+/- | 27           | 1.081121699 | 0.315727719 | 0.719082952       | 7.22694E-06 | 2.47781E-05   | TRUE            | 2.201621745 | 1           | 36          | 0.146568911 | 0.586275644   | FALSE           |                    |                            |             |     |             |                     |          |           |              |             |               |                 |       |  |  |  |
|           |             |           |          |          | 11           | 0.31085605  | 0.230553927 | 0.488995969       | 1.11768E-06 | 5.26814E-06   | TRUE            |             |             |             |             |               |                 |                    |                            |             |     |             |                     |          |           |              |             |               |                 |       |  |  |  |
|           | P12         | oTbx1+/+  | oTbx1+/- | 30       | 0.647154535  | 0.267451787 | 0.507237554 | 6.39587E-09       | 7.67        |               |                 |             |             |             |             |               |                 |                    |                            |             |     |             |                     |          |           |              |             |               |                 |       |  |  |  |



| Figure    | Measurement            | Month | Session | Genotype | # of samples | Average     | s.e.m       | Shapiro-Wilk test |             |               |                 | Levene test |     |     |             |               | Linear Mixed Model |                    |             |     | Mann-Whitney U test |             |          |          |             |              |             |               |                 |
|-----------|------------------------|-------|---------|----------|--------------|-------------|-------------|-------------------|-------------|---------------|-----------------|-------------|-----|-----|-------------|---------------|--------------------|--------------------|-------------|-----|---------------------|-------------|----------|----------|-------------|--------------|-------------|---------------|-----------------|
|           |                        |       |         |          |              |             |             | Statistic         | p_value     | p_adj(FDR BH) | Rejects(FDR 5%) | Statistic   | df1 | df2 | p_value     | p_adj(FDR BH) | Rejects(FDR 5%)    | Source             | F           | df1 | df2                 | Sig.        | Sample1  | Sample2  | Statistic   | R (Z score)  | p_value     | p_adj(FDR BH) | Rejects(FDR 5%) |
| Figure 5A | Social Interaction (s) | 1     | 1       | oTbx1+/+ | 27           | 16.40740741 | 3.092707745 | 0.822716916       | 0.000347817 | 0.000695635   | TRUE            | 0.0722396   | 1   | 36  | 0.789637762 | 0.789637762   | FALSE              | Corrected Model    | 0.497244222 | 3   | 72                  | 0.685351082 | oTbx1+/- | oTbx1+/+ | 138.5       | -0.05221416  | 0.775387862 | 0.849168654   | FALSE           |
|           |                        |       |         | oTbx1+/- | 11           | 16.09090909 | 6.185693972 | 0.732690896       | 0.001237266 | 0.001649687   | TRUE            |             |     |     |             |               |                    | Genotype           | 0.111765542 |     |                     |             | 1        | 72       | 0.739114848 |              |             |               |                 |
|           |                        |       | 2       | oTbx1+/+ | 27           | 14.40740741 | 3.858708012 | 0.644196044       | 7.09586E-07 | 2.83834E-06   | TRUE            | 0.344949992 | 1   | 36  | 0.56065175  | 0.789637762   | FALSE              | Session            | 1.379597591 | 1   | 72                  | 0.244039836 | oTbx1+/- | oTbx1+/+ | 142         | -0.033939204 | 0.849168654 | 0.849168654   | FALSE           |
|           |                        |       |         | oTbx1+/- | 11           | 11          | 3.311138228 | 0.855904878       | 0.050946602 | 0.050946602   | FALSE           |             |     |     |             |               |                    | Genotype * Session | 0.262132613 |     |                     |             | 1        | 72       | 0.610225677 |              |             |               |                 |
|           |                        | 2     | 1       | oTbx1+/+ | 21           | 24.23809524 | 7.075411737 | 0.65323431        | 7.59541E-06 | 1.51908E-05   | TRUE            | 0.093406833 | 1   | 29  | 0.762073072 | 0.762073072   | FALSE              | Corrected Model    | 1.489687533 | 3   | 58                  | 0.226836385 | oTbx1+/- | oTbx1+/+ | 93.5        | 0.087281656  | 0.662541772 | 0.723978187   | FALSE           |
|           |                        |       |         | oTbx1+/- | 10           | 30.3        | 16.01808006 | 0.521146224       | 6.44244E-06 | 1.51908E-05   | TRUE            |             |     |     |             |               |                    | Genotype           | 0.005469838 |     |                     |             | 1        | 58       | 0.941298006 |              |             |               |                 |
|           |                        |       | 2       | oTbx1+/+ | 21           | 19.61904762 | 5.080061956 | 0.764962029       | 0.000200312 | 0.000267082   | TRUE            | 0.24965746  | 1   | 29  | 0.621086413 | 0.762073072   | FALSE              | Session            | 4.309691377 | 1   | 58                  | 0.042338451 | oTbx1+/- | oTbx1+/+ | 95.5        | -0.072102238 | 0.723978187 | 0.723978187   | FALSE           |
|           |                        |       |         | oTbx1+/- | 10           | 15.2        | 5.133333333 | 0.841080498       | 0.045458931 | 0.045458931   | TRUE            |             |     |     |             |               |                    | Genotype * Session | 1.217519133 |     |                     |             | 1        | 58       | 0.274405205 |              |             |               |                 |

| Measurement            | Month | Session | Genotype          | # of samples | Average     | s.e.m       | Shapiro-Wilk test |             |               |                 | Levene test |     |     |             |               | Linear Mixed Model |                   |             |     | Mann-Whitney U test |             |                   |               |             |                   |             |               |                 |             |             |       |
|------------------------|-------|---------|-------------------|--------------|-------------|-------------|-------------------|-------------|---------------|-----------------|-------------|-----|-----|-------------|---------------|--------------------|-------------------|-------------|-----|---------------------|-------------|-------------------|---------------|-------------|-------------------|-------------|---------------|-----------------|-------------|-------------|-------|
|                        |       |         |                   |              |             |             | Statistic         | p_value     | p_adj(FDR BH) | Rejects(FDR 5%) | Statistic   | df1 | df2 | p_value     | p_adj(FDR BH) | Rejects(FDR 5%)    | Source            | F           | df1 | df2                 | Sig.        | Sample1           | Sample2       | Statistic   | R (Z score)       | p_value     | p_adj(FDR BH) | Rejects(FDR 5%) |             |             |       |
| Social Interaction (s) | 1     | 1       | PdgfraCre;Tbx1+/+ | 8            | 19          | 6.450359901 | 0.852384539       | 0.100707919 | 0.151061878   | FALSE           | 1.333074967 | 2   | 24  | 0.282495218 | 0.282495218   | FALSE              | Corrected Model   | 1.081487416 | 5   | 48                  | 0.382584793 | PdgfraCre;Tbx1+/+ | WT;Tbx1+/flox | 25.5        | 0.245049015       | 0.370382559 | 0.745047522   | FALSE           |             |             |       |
|                        |       |         | WT;Tbx1+/+        | 10           | 20          | 6.151783842 | 0.853382418       | 0.063721582 | 0.151061878   | FALSE           |             |     |     |             |               |                    | Genotype          | 1.686430667 |     |                     |             | 2                 | 48            | 0.195965476 | PdgfraCre;Tbx1+/+ | WT;Tbx1+/+  | 37            | 0.062828086     | 0.828557064 | 0.828557064 | FALSE |
|                        |       |         | WT;Tbx1+/flox     | 9            | 10.11111111 | 2.468942894 | 0.870970279       | 0.125930494 | 0.151116593   | FALSE           |             |     |     |             |               |                    | Session           | 0.495285736 |     |                     |             | 1                 | 48            | 0.484979032 | WT;Tbx1+/flox     | WT;Tbx1+/+  | 35.5          | -0.177951304    | 0.496698348 | 0.745047522 | FALSE |
|                        |       | 2       | PdgfraCre;Tbx1+/+ | 8            | 11.625      | 4.37907973  | 0.852137342       | 0.100130923 | 0.151061878   | FALSE           | 1.941945267 | 2   | 24  | 0.165308228 | 0.282495218   | FALSE              | Genotype*Session  | 0.843209591 | 2   | 48                  | 0.436601196 | PdgfraCre;Tbx1+/+ | WT;Tbx1+/flox | 31          | 0.116690007       | 0.672974085 | 0.807568902   | FALSE           |             |             |       |
|                        |       |         | WT;Tbx1+/+        | 10           | 23.3        | 9.316711389 | 0.746606164       | 0.003244757 | 0.01946854    | TRUE            |             |     |     |             |               |                    | PdgfraCre;Tbx1+/+ | WT;Tbx1+/+  |     |                     |             | 29.5              | -0.219898302  | 0.408245349 | 0.745047522       | FALSE       |               |                 |             |             |       |
|                        |       |         | WT;Tbx1+/flox     | 9            | 7           | 1.748014747 | 0.925306341       | 0.437971545 | 0.437971545   | FALSE           |             |     |     |             |               |                    | WT;Tbx1+/flox     | WT;Tbx1+/+  |     |                     |             | 29                | -0.29970746   | 0.21102427  | 0.745047522       | FALSE       |               |                 |             |             |       |
|                        | 2     | 1       | PdgfraCre;Tbx1+/+ | 8            | 25.375      | 10.82480204 | 0.646705991       | 0.000554496 | 0.001663489   | TRUE            | 0.105027705 | 2   | 18  | 0.900847215 | 0.972131      | FALSE              | Corrected Model   | 0.499425251 | 5   | 36                  | 0.774566604 | PdgfraCre;Tbx1+/+ | WT;Tbx1+/flox | 27          | 0.029880715       | 0.955089355 | 0.955089355   | FALSE           |             |             |       |
|                        |       |         | WT;Tbx1+/+        | 6            | 26.16666667 | 19.80642432 | 0.554416353       | 0.000124267 | 0.000745601   | TRUE            |             |     |     |             |               |                    | Genotype          | 0.03924997  |     |                     |             | 2                 | 36            | 0.961551418 | PdgfraCre;Tbx1+/+ | WT;Tbx1+/+  | 13.5          | 0.362284419     | 0.228438228 | 0.89044289  | FALSE |
|                        |       |         | WT;Tbx1+/flox     | 7            | 21.28571429 | 7.870119155 | 0.815067345       | 0.057543741 | 0.067157791   | FALSE           |             |     |     |             |               |                    | Session           | 1.75456665  |     |                     |             | 1                 | 36            | 0.193651322 | WT;Tbx1+/flox     | WT;Tbx1+/+  | 14.5          | 0.257539377     | 0.445221445 | 0.89044289  | FALSE |
|                        |       | 2       | PdgfraCre;Tbx1+/+ | 8            | 17.875      | 6.418270517 | 0.835164751       | 0.067157791 | 0.067157791   | FALSE           | 0.028309139 | 2   | 18  | 0.972131    | 0.972131      | FALSE              | Genotype*Session  | 0.238208993 | 2   | 36                  | 0.789270203 | PdgfraCre;Tbx1+/+ | WT;Tbx1+/flox | 26          | 0.05976143        | 0.866511267 | 0.955089355   | FALSE           |             |             |       |
|                        |       |         | WT;Tbx1+/+        | 6            | 22.83333333 | 12.78910126 | 0.642868731       | 0.00146069  | 0.002921381   | TRUE            |             |     |     |             |               |                    | PdgfraCre;Tbx1+/+ | WT;Tbx1+/+  |     |                     |             | 20.5              | -0.120761473  | 0.754578755 | 0.955089355       | FALSE       |               |                 |             |             |       |
|                        |       |         | WT;Tbx1+/flox     | 7            | 18.85714286 | 9.174053919 | 0.752239945       | 0.013389431 | 0.020084147   | TRUE            |             |     |     |             |               |                    | WT;Tbx1+/flox     | WT;Tbx1+/+  |     |                     |             | 15                | -0.237728656  | 0.445221445 | 0.89044289        | FALSE       |               |                 |             |             |       |

| Figure    | Measurement               | Month | Session | Genotype | # of samples | Average     | s.e.m       | Shapiro-Wilk test |             |               |                 | Levene test |     |     |             |               | Linear Mixed Model |                    |             |     | Mann-Whitney U test |             |          |          |           |              |             |               |                 |
|-----------|---------------------------|-------|---------|----------|--------------|-------------|-------------|-------------------|-------------|---------------|-----------------|-------------|-----|-----|-------------|---------------|--------------------|--------------------|-------------|-----|---------------------|-------------|----------|----------|-----------|--------------|-------------|---------------|-----------------|
|           |                           |       |         |          |              |             |             | Statistic         | p_value     | p_adj(FDR BH) | Rejects(FDR 5%) | Statistic   | df1 | df2 | p_value     | p_adj(FDR BH) | Rejects(FDR 5%)    | Source             | F           | df1 | df2                 | Sig.        | Sample1  | Sample2  | Statistic | R (Z score)  | p_value     | p_adj(FDR BH) | Rejects(FDR 5%) |
| Figure 5B | Sniffing novel object (s) | 1     | 1       | oTbx1+/+ | 26           | 14.57692308 | 2.634781017 | 0.846840904       | 0.001236135 | 0.00247227    | TRUE            | 0.08242971  | 1   | 35  | 0.775724316 | 0.775724316   | FALSE              | Corrected Model    | 2.521664315 | 3   | 70                  | 0.064800787 | oTbx1+/- | oTbx1+/+ | 129       | -0.076479138 | 0.65844134  | 0.934817788   | FALSE           |
|           |                           |       |         | oTbx1+/- | 11           | 12.36363636 | 3.739889953 | 0.818474025       | 0.016467715 | 0.016467715   | TRUE            |             |     |     |             |               |                    | Genotype           | 2.25065E-05 | 1   | 70                  | 0.996228266 |          |          |           |              |             |               |                 |
|           |                           |       | 2       | oTbx1+/+ | 26           | 8.115384615 | 1.778786901 | 0.802681024       | 0.000195641 | 0.000782565   | TRUE            | 1.057934255 | 1   | 35  | 0.310742865 | 0.621485731   | FALSE              | Session            | 3.706544227 | 1   | 70                  | 0.05826308  | oTbx1+/- | oTbx1+/+ | 140       | -0.016388387 | 0.934817788 | 0.934817788   | FALSE           |
|           |                           |       |         | oTbx1+/- | 11           | 10.36363636 | 4.101602186 | 0.789282155       | 0.006799356 | 0.009065808   | TRUE            |             |     |     |             |               |                    | Genotype * Session | 1.03048056  | 1   | 70                  | 0.31354175  |          |          |           |              |             |               |                 |
|           |                           | 2     | 1       | oTbx1+/+ | 21           | 8           | 1.657594356 | 0.868273317       | 0.008915895 | 0.01783179    | TRUE            | 2.542177104 | 1   | 29  | 0.12168399  | 0.243367981   | FALSE              | Corrected Model    | 0.495546864 | 3   | 58                  | 0.686790912 | oTbx1+/- | oTbx1+/+ | 104       | 0.007589709  | 0.983438982 | 0.983438982   | FALSE           |
|           |                           |       |         | oTbx1+/- | 10           | 6.8         | 1.41264134  | 0.911900064       | 0.294299164 | 0.294299164   | FALSE           |             |     |     |             |               |                    | Genotype           | 0.116338641 | 1   | 58                  | 0.734272506 |          |          |           |              |             |               |                 |
|           |                           |       | 2       | oTbx1+/+ | 21           | 6.333333333 | 1.731134136 | 0.786296484       | 0.000408019 | 0.001632078   | TRUE            | 0.028910762 | 1   | 29  | 0.86616589  | 0.86616589    | FALSE              | Session            | 0.920506319 | 1   | 58                  | 0.341324669 | oTbx1+/- | oTbx1+/+ | 99        | 0.045538256  | 0.81932528  | 0.983438982   | FALSE           |
|           |                           |       |         | oTbx1+/- | 10           | 5.9         | 2.008039398 | 0.823579501       | 0.027996164 | 0.037328218   | TRUE            |             |     |     |             |               |                    | Genotype * Session | 0.082129844 | 1   | 58                  | 0.775452844 |          |          |           |              |             |               |                 |

| Measurement               | Month | Session | Genotype          | # of samples | Average     | s.e.m       | Shapiro-Wilk test |             |               |                 | Levene test |     |     |             |               | Generalized Linear Mixed Model |                   |             |      | Mann-Whitney U test |             |                   |               |           |              |             |               |                 |
|---------------------------|-------|---------|-------------------|--------------|-------------|-------------|-------------------|-------------|---------------|-----------------|-------------|-----|-----|-------------|---------------|--------------------------------|-------------------|-------------|------|---------------------|-------------|-------------------|---------------|-----------|--------------|-------------|---------------|-----------------|
|                           |       |         |                   |              |             |             | Statistic         | p_value     | p_adj(FDR BH) | Rejects(FDR 5%) | Statistic   | df1 | df2 | p_value     | p_adj(FDR BH) | Rejects(FDR 5%)                | Source            | F           | df1  | df2                 | Sig.        | Sample1           | Sample2       | Statistic | R (Z score)  | p_value     | p_adj(FDR BH) | Rejects(FDR 5%) |
| Sniffing novel object (s) | 1     | 1       | PdgfraCre;Tbx1+/+ | 8            | 12          | 3.9551052   | 0.861423719       | 0.124057733 | 0.148869279   | FALSE           | 0.476633313 | 2   | 23  | 0.626867139 | 0.952913718   | FALSE                          | Corrected Model   | 3.093385391 | 5    | 46                  | 0.017260974 | PdgfraCre;Tbx1+/+ | WT;Tbx1+/flox | 30.5      | -0.128359008 | 0.672974085 | 0.931427396   | FALSE           |
|                           |       |         | WT;Tbx1+/+        | 9            | 14          | 3.989569735 | 0.818691778       | 0.033304831 | 0.066609661   | FALSE           |             |     |     |             |               |                                | Genotype          | 0.177160277 | 2    | 46                  | 0.838214318 | PdgfraCre;Tbx1+/+ | WT;Tbx1+/+    | 30        | -0.140028008 | 0.605841218 | 0.931427396   | FALSE           |
|                           |       |         | WT;Tbx1+/flox     | 9            | 17.44444444 | 5.725457554 | 0.864838833       | 0.10819449  | 0.148869279   | FALSE           |             |     |     |             |               |                                | Session           | 12.98794535 | 1    | 46                  | 0.000767292 | WT;Tbx1+/flox     | WT;Tbx1+/+    | 37        | 0.072845563  | 0.796174414 | 0.931427396   | FALSE           |
|                           |       | 2       | PdgfraCre;Tbx1+/+ | 8            | 7           | 3.5152728   | 0.759035249       | 0.010275376 | 0.030826129   | TRUE            | 0.048332199 | 2   | 23  | 0.952913718 | 0.952913718   | FALSE                          | Genotype*Session  | 0.931759073 | 2    | 46                  | 0.401165818 | PdgfraCre;Tbx1+/+ | WT;Tbx1+/flox | 28        | -0.186704011 | 0.480707528 | 0.931427396   | FALSE           |
|                           |       |         | WT;Tbx1+/+        | 9            | 9.555555556 | 3.667087518 | 0.721553597       | 0.00253196  | 0.01519176    | TRUE            |             |     |     |             |               |                                | PdgfraCre;Tbx1+/+ | WT;Tbx1+/+  | 26   | -0.233380014        | 0.370382559 | 0.931427396       | FALSE         |           |              |             |               |                 |
|                           |       |         | WT;Tbx1+/flox     | 9            | 7.666666667 | 2.254624876 | 0.919315229       | 0.386600395 | 0.386600395   | FALSE           |             |     |     |             |               |                                | WT;Tbx1+/flox     | WT;Tbx1+/+  | 39   | -0.031219527        | 0.931427396 | 0.931427396       | FALSE         |           |              |             |               |                 |
|                           | 2     | 1       | PdgfraCre;Tbx1+/+ | 8            | 7.5         | 2.692582404 | 0.907626652       | 0.337653424 | 0.37778911    | FALSE           | 0.627763682 | 2   | 18  | 0.545071894 | 0.545071894   | FALSE                          | Corrected Model   | 0.477274668 | 5    | 36                  | 0.790748408 | PdgfraCre;Tbx1+/+ | WT;Tbx1+/flox | 27        | -0.029880715 | 0.955089355 | 1             | FALSE           |
|                           |       |         | WT;Tbx1+/+        | 6            | 8           | 2.695675549 | 0.87228892        | 0.23548219  | 0.353223285   | FALSE           |             |     |     |             |               |                                | Genotype          | 0.057987693 | 2    | 36                  | 0.943749519 | PdgfraCre;Tbx1+/+ | WT;Tbx1+/+    | 23.5      | -0.017251639 | 1           | 1             | FALSE           |
|                           |       |         | WT;Tbx1+/flox     | 7            | 8.571428571 | 3.537938214 | 0.813275039       | 0.055283937 | 0.110567873   | FALSE           |             |     |     |             |               |                                | Session           | 1.061158579 | 1    | 36                  | 0.309822637 | WT;Tbx1+/flox     | WT;Tbx1+/+    | 19        | -0.079242885 | 0.835664336 | 1             | FALSE           |
|                           |       | 2       | PdgfraCre;Tbx1+/+ | 8            | 8           | 4.110092109 | 0.764055086       | 0.011666808 | 0.070000849   | FALSE           | 1.298312466 | 2   | 18  | 0.297363734 | 0.545071894   | FALSE                          | Genotype*Session  | 0.658142803 | 2    | 36                  | 0.523930478 | PdgfraCre;Tbx1+/+ | WT;Tbx1+/flox | 27        | 0.029880715  | 0.955089355 | 1             | FALSE           |
|                           |       |         | WT;Tbx1+/+        | 6            | 6.333333333 | 1.452966315 | 0.90065047        | 0.37778911  | 0.37778911    | FALSE           |             |     |     |             |               |                                | PdgfraCre;Tbx1+/+ | WT;Tbx1+/+  | 19.5 | -0.155264751        | 0.662004662 | 1                 | FALSE         |           |              |             |               |                 |
|                           |       |         | WT;Tbx1+/flox     | 7            | 4.428571429 | 2.191511143 | 0.796592563       | 0.037898712 | 0.110567873   | FALSE           |             |     |     |             |               |                                | WT;Tbx1+/flox     | WT;Tbx1+/+  | 14   | -0.277350098        | 0.365967366 | 1                 | FALSE         |           |              |             |               |                 |

| Figure    | Measurement   | Month | Delay (s) | Genotype | # of samples | Average     | s.e.m       | Shapiro-Wilk test |             |               |                 | Levene test |     |     |             |               | Linear Mixed Model |                  |             |     |     | Mann-Whitney U test |             |             |           |              |              |               |                 |       |
|-----------|---------------|-------|-----------|----------|--------------|-------------|-------------|-------------------|-------------|---------------|-----------------|-------------|-----|-----|-------------|---------------|--------------------|------------------|-------------|-----|-----|---------------------|-------------|-------------|-----------|--------------|--------------|---------------|-----------------|-------|
|           |               |       |           |          |              |             |             | Statistic         | p_value     | p_adj(FDR BH) | Rejects(FDR 5%) | Statistic   | df1 | df2 | p_value     | p_adj(FDR BH) | Rejects(FDR 5%)    | Source           | F           | df1 | df2 | Sig.                | Sample1     | Sample2     | Statistic | R (Z score)  | p_value      | p_adj(FDR BH) | Rejects(FDR 5%) |       |
| Figure 6A | % alternation | 1     | 0         | oTbx1+/+ | 24           | 87.96296296 | 2.209774585 | 0.817882433       | 0.000586058 | 0.001758173   | TRUE            | 1.26349718  | 1   | 32  | 0.269351926 | 0.808055777   | FALSE              | Corrected Model  | 66.06011981 | 5   | 96  | 0                   | oTbx1+/-    | oTbx1+/+    | 113       | 0.045374261  | 0.809114032  | 0.809114032   | FALSE           |       |
|           |               |       |           | oTbx1+/- | 10           | 88.88888889 | 3.3126933   | 0.84073699        | 0.04503041  | 0.054036492   | FALSE           |             |     |     |             |               |                    | Genotype         | 4.660889678 | 1   | 96  |                     | 0.033349839 |             |           |              |              |               |                 |       |
|           |               |       | 15        | oTbx1+/+ | 24           | 51.85185185 | 2.184325276 | 0.813035203       | 0.000484908 | 0.001758173   | TRUE            | 0.003101076 | 1   | 32  | 0.955937164 | 0.955937164   | FALSE              | Delay            | 122.9828701 | 2   | 96  |                     | 0           | oTbx1+/-    | oTbx1+/+  | 113          | 0.045374261  | 0.809114032   | 0.809114032     | FALSE |
|           |               |       |           | oTbx1+/- | 10           | 53.33333333 | 3.228814032 | 0.884986306       | 0.14879822  | 0.14879822    | FALSE           |             |     |     |             |               |                    | Genotype * Delay | 3.150937861 | 2   | 96  |                     | 0.04727228  |             |           |              |              |               |                 |       |
|           |               |       | 30        | oTbx1+/+ | 24           | 44.90740741 | 2.059150213 | 0.905249105       | 0.027853786 | 0.041780679   | TRUE            | 0.011740247 | 1   | 32  | 0.914392707 | 0.955937164   | FALSE              | Corrected Model  | 38.5469499  | 5   | 81  |                     | 0           | oTbx1+/-    | oTbx1+/+  | 43           | 0.499116867  | 0.002700336   | 0.008101007     | TRUE  |
|           |               |       |           | oTbx1+/- | 10           | 57.77777778 | 2.771598064 | 0.819704545       | 0.025134415 | 0.041780679   | TRUE            |             |     |     |             |               |                    | Genotype         | 2.046863951 | 1   | 81  |                     |             | 0.156366686 |           |              |              |               |                 |       |
|           |               | 2     | 0         | oTbx1+/+ | 20           | 88.88888889 | 2.418254167 | 0.832136365       | 0.002714676 | 0.008144029   | TRUE            | 0.005608641 | 1   | 27  | 0.940853676 | 0.940853676   | FALSE              | Genotype         | 2.046863951 | 1   | 81  | 0.156366686         |             | oTbx1+/-    | oTbx1+/+  | 80           | -0.087537622 | 0.660118692   | 0.660118692     | FALSE |
|           |               |       |           | oTbx1+/- | 9            | 85.18518519 | 4.899539465 | 0.790885567       | 0.016062009 | 0.032124018   | TRUE            |             |     |     |             |               |                    | Delay            | 81.56087251 | 2   | 81  | 0                   |             | oTbx1+/-    | oTbx1+/+  | 72.5         | -0.153190838 | 0.443859589   | 0.660118692     | FALSE |
|           |               |       | 15        | oTbx1+/+ | 20           | 54.44444444 | 2.265657383 | 0.898171934       | 0.038114561 | 0.057171842   | FALSE           | 2.474961012 | 1   | 27  | 0.127318695 | 0.381956086   | FALSE              | Genotype * Delay | 0.243946056 | 2   | 81  | 0.784103458         |             | oTbx1+/-    | oTbx1+/+  | 75           | -0.131306433 | 0.501389665   | 0.660118692     | FALSE |
|           |               |       |           | oTbx1+/- | 9            | 48.14814815 | 5.237828009 | 0.911520399       | 0.326661423 | 0.337937343   | FALSE           |             |     |     |             |               |                    | Corrected Model  | 38.5469499  | 5   | 81  | 0.784103458         |             |             |           |              |              |               |                 |       |
|           |               |       | 30        | oTbx1+/+ | 20           | 51.11111111 | 2.47140896  | 0.800994201       | 0.000893986 | 0.005363913   | TRUE            | 0.039618489 | 1   | 27  | 0.843719703 | 0.940853676   | FALSE              | Genotype         | 2.046863951 | 1   | 81  | 0.156366686         | oTbx1+/-    | oTbx1+/+    | 75        | -0.131306433 | 0.501389665  | 0.660118692   | FALSE           |       |
|           |               |       |           | oTbx1+/- | 9            | 49.38271605 | 3.266359643 | 0.913067364       | 0.337937343 | 0.337937343   | FALSE           |             |     |     |             |               |                    | Delay            | 81.56087251 | 2   | 81  | 0.784103458         |             |             |           |              |              |               |                 |       |

| Measurement   | Month | Delay (s) | Genotype          | # of samples      | Average     | s.e.m       | Shapiro-Wilk test |             |               |                 | Levene test |             |     |             |               | Generalized Linear Mixed Model |                   |                 |             |              | Mann-Whitney U test |                   |                   |                   |                   |              |               |                 |             |            |       |
|---------------|-------|-----------|-------------------|-------------------|-------------|-------------|-------------------|-------------|---------------|-----------------|-------------|-------------|-----|-------------|---------------|--------------------------------|-------------------|-----------------|-------------|--------------|---------------------|-------------------|-------------------|-------------------|-------------------|--------------|---------------|-----------------|-------------|------------|-------|
|               |       |           |                   |                   |             |             | Statistic         | p_value     | p_adj(FDR BH) | Rejects(FDR 5%) | Statistic   | df1         | df2 | p_value     | p_adj(FDR BH) | Rejects(FDR 5%)                | Source            | F               | df1         | df2          | Sig.                | Sample1           | Sample2           | Statistic         | R (Z score)       | p_value      | p_adj(FDR BH) | Rejects(FDR 5%) |             |            |       |
| % alternation | 1     | 0         | PdgfraCre;Tbx1+/+ | 8                 | 86.11111111 | 2.777777778 | 0.827205306       | 0.05551859  | 0.124916827   | FALSE           | 0.400924437 | 2           | 21  | 0.674718601 | 0.961718489   | FALSE                          | Corrected Model   | 31.01103484     | 8           | 63           | 0                   | PdgfraCre;Tbx1+/+ | WT;Tbx1+/flox     | 26.5              | -0.221711013      | 0.423447141  | 1             | FALSE           |             |            |       |
|               |       |           | WT;Tbx1+/+        | 7                 | 87.3015873  | 4.489566865 | 0.664435629       | 0.001497441 | 0.006738486   | TRUE            |             |             |     |             |               |                                | Genotype          | 0.104620037     | 2           | 63           |                     | 0.900822824       | PdgfraCre;Tbx1+/+ | WT;Tbx1+/+        | 27.5              | -0.014940358 | 1             | 1               | FALSE       |            |       |
|               |       |           | WT;Tbx1+/flox     | 9                 | 90.12345679 | 4.320987654 | 0.775541227       | 0.01070126  | 0.032103779   | TRUE            |             |             |     |             |               |                                | Delay             | 121.2150635     | 2           | 63           |                     | 0                 | WT;Tbx1+/flox     | WT;Tbx1+/+        | 27.5              | 0.105851225  | 0.757692308   | 1               | FALSE       |            |       |
|               |       | 15        | PdgfraCre;Tbx1+/+ | 8                 | 50          | 4.199605256 | 0.567903737       | 6.66981E-05 | 0.000600283   | TRUE            | 0.122464503 | 2           | 21  | 0.885364514 | 0.961718489   | FALSE                          | Genotype*Delay    | 0.26479949      | 4           | 63           |                     | 0.899485819       | PdgfraCre;Tbx1+/+ | WT;Tbx1+/flox     | 35                | -0.023338001 | 0.962566845   | 1               | FALSE       |            |       |
|               |       |           | WT;Tbx1+/+        | 7                 | 53.96825397 | 4.489566865 | 0.893581377       | 0.293870591 | 0.293870591   | FALSE           |             |             |     |             |               |                                | PdgfraCre;Tbx1+/+ | WT;Tbx1+/+      | 22.5        | -0.164343934 |                     | 0.612587413       | 1                 | FALSE             |                   |              |               |                 |             |            |       |
|               |       |           | WT;Tbx1+/flox     | 9                 | 51.85185185 | 3.207501495 | 0.872821722       | 0.131797654 | 0.175446148   | FALSE           |             |             |     |             |               |                                | WT;Tbx1+/flox     | WT;Tbx1+/+      | 27          | -0.119082628 |                     | 0.680594406       | 1                 | FALSE             |                   |              |               |                 |             |            |       |
|               |       | 30        | PdgfraCre;Tbx1+/+ | 8                 | 45.83333333 | 3.893138268 | 0.871515193       | 0.155952131 | 0.175446148   | FALSE           | 0.039106145 | 2           | 21  | 0.961718489 | 0.961718489   | FALSE                          | PdgfraCre;Tbx1+/+ | WT;Tbx1+/flox   | 35.5        | -0.011669001 |                     | 1                 | 1                 | FALSE             |                   |              |               |                 |             |            |       |
|               |       |           | WT;Tbx1+/+        | 7                 | 44.44444444 | 3.428963332 | 0.8577129         | 0.144397137 | 0.175446148   | FALSE           |             |             |     |             |               |                                | PdgfraCre;Tbx1+/+ | WT;Tbx1+/+      | 27          | 0.029880715  |                     | 0.955089355       | 1                 | FALSE             |                   |              |               |                 |             |            |       |
|               |       |           | WT;Tbx1+/flox     | 9                 | 44.44444444 | 3.703703704 | 0.853289618       | 0.080990849 | 0.145783528   | FALSE           |             |             |     |             |               |                                | WT;Tbx1+/flox     | WT;Tbx1+/+      | 30          | 0.039694209  |                     | 0.918181818       | 1                 | FALSE             |                   |              |               |                 |             |            |       |
|               |       | 2         | 0                 | PdgfraCre;Tbx1+/+ | 8           | 87.5        | 3.893138268       | 0.735991362 | 0.005710635   | 0.019119856     | TRUE        | 0.205732484 | 2   | 17          | 0.816047931   | 0.925960593                    | FALSE             | Corrected Model | 22.23991673 | 8            |                     | 51                | 3.94129E-14       | PdgfraCre;Tbx1+/+ | WT;Tbx1+/flox     | 22           | -0.069006556  | 0.851814852     | 0.94971695  | FALSE      |       |
|               |       |           |                   | WT;Tbx1+/+        | 6           | 90.74074074 | 5.30289669        | 0.772718964 | 0.032937266   | 0.074108848     | FALSE       |             |     |             |               |                                |                   | Genotype        | 0.119696984 | 2            |                     | 51                |                   | 0.887437723       | PdgfraCre;Tbx1+/+ | WT;Tbx1+/+   | 19.5          | -0.155264751    | 0.662004662 | 0.94971695 | FALSE |
|               |       |           |                   | WT;Tbx1+/flox     | 6           | 88.88888889 | 4.05720413        | 0.853191607 | 0.167002833   | 0.214717928     | FALSE       |             |     |             |               |                                |                   | Delay           | 87.4546486  | 2            |                     | 51                |                   | 0                 | WT;Tbx1+/flox     | WT;Tbx1+/+   | 15            | -0.138675049    | 0.699134199 | 0.94971695 | FALSE |
|               | 15    |           | PdgfraCre;Tbx1+/+ | 8                 | 55.55555556 | 2.969569355 | 0.848910992       | 0.092877818 | 0.139316727   | FALSE           | 0.476       | 2           | 17  | 0.629298498 | 0.925960593   | FALSE                          | Genotype*Delay    | 0.640087093     | 4           | 51           | 0.636335206         | PdgfraCre;Tbx1+/+ |                   | WT;Tbx1+/flox     | 17                | 0.241522946  | 0.413586414   | 0.94971695      | FALSE       |            |       |
|               |       |           | WT;Tbx1+/+        | 6                 | 57.40740741 | 5.30289669  | 0.907578534       | 0.420658529 | 0.473240845   | FALSE           |             |             |     |             |               |                                | PdgfraCre;Tbx1+/+ | WT;Tbx1+/+      | 23          | -0.034503278 | 0.94971695          | 0.94971695        |                   | FALSE             |                   |              |               |                 |             |            |       |
|               |       |           | WT;Tbx1+/flox     | 6                 | 50          | 3.79516695  | 0.701259348       | 0.006373285 | 0.019119856   | TRUE            |             |             |     |             |               |                                | WT;Tbx1+/flox     | WT;Tbx1+/+      | 13          | -0.231125082 | 0.484848485         | 0.94971695        |                   | FALSE             |                   |              |               |                 |             |            |       |
|               | 30    |           | PdgfraCre;Tbx1+/+ | 8                 | 52.77777778 | 3.482128725 | 0.826041799       | 0.053987435 | 0.097177383   | FALSE           | 0.077272727 | 2           | 17  | 0.925960593 | 0.925960593   | FALSE                          | PdgfraCre;Tbx1+/+ | WT;Tbx1+/flox   | 23          | 0.034503278  | 0.94971695          | 0.94971695        |                   | FALSE             |                   |              |               |                 |             |            |       |
|               |       |           | WT;Tbx1+/+        | 6                 | 48.14814815 | 5.493480361 | 0.665788341       | 0.002641354 | 0.019119856   | TRUE            |             |             |     |             |               |                                | PdgfraCre;Tbx1+/+ | WT;Tbx1+/+      | 19.5        | 0.155264751  | 0.662004662         | 0.94971695        |                   | FALSE             |                   |              |               |                 |             |            |       |
|               |       |           | WT;Tbx1+/flox     | 6                 | 51.85185185 | 4.684855793 | 0.915458969       | 0.473270921 | 0.473270921   | FALSE           |             |             |     |             |               |                                | WT;Tbx1+/flox     | WT;Tbx1+/+      | 15.5        | 0.115562541  | 0.818181818         | 0.94971695        |                   | FALSE             |                   |              |               |                 |             |            |       |

| Figure    | Measurement                | Month    | Delay (s) | Genotype    | # of samples | Average     | s.e.m       | Shapiro-Wilk test |             |                  |                 | Levene test |     |             |             |               | Linear Mixed Model |                 |             |             |             | Mann-Whitney U test |          |          |              |              |             |               |                 |
|-----------|----------------------------|----------|-----------|-------------|--------------|-------------|-------------|-------------------|-------------|------------------|-----------------|-------------|-----|-------------|-------------|---------------|--------------------|-----------------|-------------|-------------|-------------|---------------------|----------|----------|--------------|--------------|-------------|---------------|-----------------|
|           |                            |          |           |             |              |             |             | Statistic         | p_value     | p_adj(FDR BH)    | Rejects(FDR 5%) | Statistic   | df1 | df2         | p_value     | p_adj(FDR BH) | Rejects(FDR 5%)    | Source          | F           | df1         | df2         | Sig.                | Sample1  | Sample2  | Statistic    | R (Z score)  | p_value     | p_adj(FDR BH) | Rejects(FDR 5%) |
| Figure 5B | Latency to correct arm (s) | 1        | 0         | oTbx1+/+    | 24           | 7.060929233 | 0.514093404 | 0.800175638       | 0.00029653  | 0.00177918       | TRUE            | 0.277615077 | 1   | 32          | 0.601902435 | 0.601902435   | FALSE              | Corrected Model | 16.83605715 | 5           | 96          | 6.44695E-12         | oTbx1+/- | oTbx1+/+ | 110          | 0.064820372  | 0.723944044 | 0.896531195   | FALSE           |
|           |                            |          |           | oTbx1+/-    | 10           | 7.045238095 | 0.530928951 | 0.926337453       | 0.412848339 | 0.476660672      | FALSE           |             |     |             |             |               |                    | Genotype        | 2.181306251 | 1           | 96          | 0.142968861         |          |          |              |              |             |               |                 |
|           |                            |          | 15        | oTbx1+/+    | 24           | 23.71111111 | 3.024286701 | 0.822986774       | 0.000717253 | 0.00215176       | TRUE            | 0.326055759 | 1   | 32          | 0.571979595 | 0.601902435   | FALSE              | Delay           | 27.42527721 | 2           | 96          | 3.79112E-10         | oTbx1+/- | oTbx1+/+ | 116          | -0.025928149 | 0.896531195 | 0.896531195   | FALSE           |
|           |                            | oTbx1+/- | 10        | 21.89666667 | 3.777162368  | 0.850065677 | 0.058193748 | 0.116387496       | FALSE       | Genotype * Delay | 2.058495873     |             |     |             |             |               |                    | 2               | 96          | 0.13324324  |             |                     |          |          |              |              |             |               |                 |
|           |                            | 30       | oTbx1+/+  | 24          | 30.76111111  | 2.763625603 | 0.951467639 | 0.29143235        | 0.437148525 | FALSE            | 1.123976658     | 1           | 32  | 0.297000607 | 0.601902435 | FALSE         |                    |                 |             |             |             | oTbx1+/-            | oTbx1+/+ | 67       | -0.343547973 | 0.045949085  | 0.137847254 | FALSE         |                 |
|           |                            | oTbx1+/- | 10        | 20.47833333 | 3.235213323  | 0.932865391 | 0.476660672 | 0.476660672       | FALSE       |                  |                 |             |     |             |             |               |                    |                 |             |             |             |                     |          |          |              |              |             |               |                 |
|           | 2                          | 0        | oTbx1+/+  | 20          | 8.249603175  | 1.084890689 | 0.650063636 | 1.01826E-05       | 6.10959E-05 | TRUE             | 1.416496538     | 1           | 27  | 0.244340874 | 0.366511312 | FALSE         | Corrected Model    | 9.617022113     | 5           | 81          | 3.11418E-07 | oTbx1+/-            | oTbx1+/+ | 79       | 0.096291384  | 0.626843222  | 0.626843222 | FALSE         |                 |
|           |                            |          | oTbx1+/-  | 9           | 10.25432099  | 2.448449218 | 0.825388972 | 0.039632942       | 0.118898826 | FALSE            |                 |             |     |             |             |               | Genotype           | 1.113528338     | 1           | 81          | 0.294453611 |                     |          |          |              |              |             |               |                 |
|           |                            | 15       | oTbx1+/+  | 20          | 21.45690476  | 2.262232887 | 0.949405569 | 0.358157001       | 0.358157001 | FALSE            | 1.772805112     | 1           | 27  | 0.194168243 | 0.366511312 | FALSE         | Delay              | 18.44615477     | 2           | 81          | 2.50312E-07 | oTbx1+/-            | oTbx1+/+ | 58       | 0.28012039   | 0.13969359   | 0.419080769 | FALSE         |                 |
|           |                            | oTbx1+/- | 9         | 32.12037037 | 6.192265298  | 0.86589138  | 0.11106244  | 0.145532979       | FALSE       | Genotype * Delay |                 |             |     |             |             |               | 2.582518592        | 2               | 81          | 0.081796465 |             |                     |          |          |              |              |             |               |                 |
|           |                            | 30       | oTbx1+/+  | 20          | 27.41833333  | 3.194822863 | 0.924555501 | 0.121277482       | 0.145532979 | FALSE            | 0.387060947     | 1           | 27  | 0.539067153 | 0.539067153 | FALSE         |                    |                 |             |             |             | oTbx1+/-            | oTbx1+/+ | 71       | -0.166321482 | 0.390153575  | 0.585230362 | FALSE         |                 |
|           |                            | oTbx1+/- | 9         | 23.54814815 | 4.343311557  | 0.852295522 | 0.078981247 | 0.145532979       | FALSE       |                  |                 |             |     |             |             |               |                    |                 |             |             |             |                     |          |          |              |              |             |               |                 |

| Measurement                | Month | Delay (s)     | Genotype          | # of samples | Average     | s.e.m       | Shapiro-Wilk test |             |               |                              | Levene test |     |     |             |               | Generalized Linear Mixed Model |                 |              |             |             | Mann-Whitney U test |                                 |         |              |             |             |               |
|----------------------------|-------|---------------|-------------------|--------------|-------------|-------------|-------------------|-------------|---------------|------------------------------|-------------|-----|-----|-------------|---------------|--------------------------------|-----------------|--------------|-------------|-------------|---------------------|---------------------------------|---------|--------------|-------------|-------------|---------------|
|                            |       |               |                   |              |             |             | Statistic         | p_value     | p_adj(FDR BH) | Rejects(FDR 5%)              | Statistic   | df1 | df2 | p_value     | p_adj(FDR BH) | Rejects(FDR 5%)                | Source          | F            | df1         | df2         | Sig.                | Sample1                         | Sample2 | Statistic    | R (Z score) | p_value     | p_adj(FDR BH) |
| Latency to correct arm (s) | 1     | 0             | PdgfraCre;Tbx1+/+ | 8            | 6.936507937 | 1.245302549 | 0.49801402        | 9.77951E-06 | 8.80156E-05   | TRUE                         | 0.118489741 | 2   | 21  | 0.888850552 | 0.888850552   | FALSE                          | Corrected Model | 12.80465967  | 8           | 63          | 9.75433E-11         | PdgfraCre;Tbx1+/+ WT;Tbx1+/flox | 26      | -0.233380014 | 0.370382559 | 0.666688606 | FALSE         |
|                            |       |               | WT;Tbx1+/+        | 7            | 7.238095238 | 0.859979629 | 0.889504742       | 0.272090107 | 0.61220274    | FALSE                        |             |     |     |             |               |                                | Genotype        | 1.578749645  | 2           | 63          | 0.214282282         | PdgfraCre;Tbx1+/+ WT;Tbx1+/+    | 27      | -0.029880715 | 0.955089355 | 1           | FALSE         |
|                            |       |               | WT;Tbx1+/flox     | 9            | 7.033730159 | 0.619516622 | 0.953498416       | 0.728441817 | 0.964816546   | FALSE                        |             |     |     |             |               |                                | Delay           | 41.38453208  | 2           | 63          | 3.34022E-12         | WT;Tbx1+/flox WT;Tbx1+/+        | 31.5    | 0            | 1           | 1           | FALSE         |
|                            |       | 15            | PdgfraCre;Tbx1+/+ | 8            | 32.51875    | 7.148675811 | 0.867888501       | 0.143716676 | 0.61220274    | FALSE                        | 1.806979696 | 2   | 21  | 0.188754388 | 0.283131582   | FALSE                          | Genotype*Delay  | 4.562533663  | 4           | 63          | 0.0026726           | PdgfraCre;Tbx1+/+ WT;Tbx1+/flox | 30      | 0.140028008  | 0.605841218 | 0.778938708 | FALSE         |
|                            |       | WT;Tbx1+/+    | 7                 | 13.89285714  | 1.511419745 | 0.881281719 | 0.232198499       | 0.61220274  | FALSE         | PdgfraCre;Tbx1+/+ WT;Tbx1+/+ |             |     |     |             |               |                                | 8               | 0.597614305  | 0.020512821 | 0.140034965 | FALSE               |                                 |         |              |             |             |               |
|                            |       | WT;Tbx1+/flox | 9                 | 23.51851852  | 3.323532402 | 0.936177907 | 0.542290058       | 0.964816546 | FALSE         | WT;Tbx1+/flox WT;Tbx1+/+     |             |     |     |             |               |                                | 14              | 0.463099109  | 0.071153846 | 0.213461538 | FALSE               |                                 |         |              |             |             |               |
|                            |       | 30            | PdgfraCre;Tbx1+/+ | 8            | 33.4        | 5.751512051 | 0.954254508       | 0.753939808 | 0.964816546   | FALSE                        | 2.91193178  | 2   | 21  | 0.076529454 | 0.229588362   | FALSE                          |                 |              |             |             |                     | PdgfraCre;Tbx1+/+ WT;Tbx1+/flox | 20      | 0.373408022  | 0.138790621 | 0.312278898 | FALSE         |
|                            |       | WT;Tbx1+/+    | 7                 | 37.25952381  | 4.89605426  | 0.981124342 | 0.964816546       | 0.964816546 | FALSE         | PdgfraCre;Tbx1+/+ WT;Tbx1+/+ |             |     |     |             |               |                                | 22              | -0.179284291 | 0.535819736 | 0.778938708 | FALSE               |                                 |         |              |             |             |               |
|                            |       | WT;Tbx1+/flox | 9                 | 23.36111111  | 2.668082668 | 0.967019227 | 0.868103653       | 0.964816546 | FALSE         | WT;Tbx1+/flox WT;Tbx1+/+     |             |     |     |             |               |                                | 11              | -0.542487527 | 0.031118881 | 0.140034965 | FALSE               |                                 |         |              |             |             |               |
|                            | 2     | 0             | PdgfraCre;Tbx1+/+ | 8            | 7.634672619 | 0.856014268 | 0.893506903       | 0.252187548 | 0.567421983   | FALSE                        | 2.318063852 | 2   | 17  | 0.128762611 | 0.193143916   | FALSE                          | Corrected Model | 5.716167127  | 8           | 51          | 3.39007E-05         | PdgfraCre;Tbx1+/+ WT;Tbx1+/flox | 20      | -0.138013112 | 0.662004662 | 0.754578755 | FALSE         |
|                            |       |               | WT;Tbx1+/+        | 6            | 6.136574074 | 0.419288306 | 0.935332466       | 0.621863247 | 0.799538461   | FALSE                        |             |     |     |             |               |                                | Genotype        | 0.163060535  | 2           | 51          | 0.849980901         | PdgfraCre;Tbx1+/+ WT;Tbx1+/+    | 14.5    | 0.327781141  | 0.282384282 | 0.754578755 | FALSE         |
|                            |       |               | WT;Tbx1+/flox     | 6            | 11.18253968 | 3.263533536 | 0.781374891       | 0.039698931 | 0.357290375   | FALSE                        |             |     |     |             |               |                                | Delay           | 20.11273606  | 2           | 51          | 3.63144E-07         | WT;Tbx1+/flox WT;Tbx1+/+        | 12.5    | 0.25423759   | 0.484848485 | 0.754578755 | FALSE         |
|                            |       | 15            | PdgfraCre;Tbx1+/+ | 8            | 18.46458333 | 3.639106975 | 0.925920356       | 0.479712667 | 0.799538461   | FALSE                        | 3.251300612 | 2   | 17  | 0.063728018 | 0.191184054   | FALSE                          | Genotype*Delay  | 1.061101788  | 4           | 51          | 0.385349838         | PdgfraCre;Tbx1+/+ WT;Tbx1+/flox | 16      | -0.276026224 | 0.344988345 | 0.754578755 | FALSE         |
|                            |       | WT;Tbx1+/+    | 6                 | 20.77301587  | 2.072925902 | 0.928919732 | 0.571785689       | 0.799538461 | FALSE         | PdgfraCre;Tbx1+/+ WT;Tbx1+/+ |             |     |     |             |               |                                | 18              | -0.207019668 | 0.490842491 | 0.754578755 | FALSE               |                                 |         |              |             |             |               |
|                            |       | WT;Tbx1+/flox | 6                 | 26.13055556  | 5.381154386 | 0.960050918 | 0.820132956       | 0.820132956 | FALSE         | WT;Tbx1+/flox WT;Tbx1+/+     |             |     |     |             |               |                                | 15              | 0.138675049  | 0.699134199 | 0.754578755 | FALSE               |                                 |         |              |             |             |               |
|                            |       | 30            | PdgfraCre;Tbx1+/+ | 8            | 28.00625    | 6.083776841 | 0.851422944       | 0.0984807   | 0.44316315    | FALSE                        | 0.906736253 | 2   | 17  | 0.422502853 | 0.422502853   | FALSE                          |                 |              |             |             |                     | PdgfraCre;Tbx1+/+ WT;Tbx1+/flox | 21      | 0.103509834  | 0.754578755 | 0.754578755 | FALSE         |
|                            |       | WT;Tbx1+/+    | 6                 | 30.63333333  | 6.500957194 | 0.873464834 | 0.240368777       | 0.567421983 | FALSE         | PdgfraCre;Tbx1+/+ WT;Tbx1+/+ |             |     |     |             |               |                                | 21              | -0.103509834 | 0.754578755 | 0.754578755 | FALSE               |                                 |         |              |             |             |               |
|                            |       | WT;Tbx1+/flox | 6                 | 23.41944444  | 3.546480824 | 0.954883247 | 0.779566398       | 0.820132956 | FALSE         | WT;Tbx1+/flox WT;Tbx1+/+     |             |     |     |             |               |                                | 13              | -0.231125082 | 0.484848485 | 0.754578755 | FALSE               |                                 |         |              |             |             |               |

| Figure    | Measurement      | Month | Genotype | # of samples | Average     | s.e.m       | Shapiro-Wilk test |             |               |                 | Levene test |     |     |             |               | Mann-Whitney U test |          |          |           |             |             |               |                 |
|-----------|------------------|-------|----------|--------------|-------------|-------------|-------------------|-------------|---------------|-----------------|-------------|-----|-----|-------------|---------------|---------------------|----------|----------|-----------|-------------|-------------|---------------|-----------------|
|           |                  |       |          |              |             |             | Statistic         | p_value     | p_adj(FDR BH) | Rejects(FDR 5%) | Statistic   | df1 | df2 | p_value     | p_adj(FDR BH) | Rejects(FDR 5%)     | Sample1  | Sample2  | Statistic | R (Z score) | p_value     | p_adj(FDR BH) | Rejects(FDR 5%) |
| Figure 7A | % open arms time | 1     | oTbx1+/+ | 23           | 13.92453346 | 2.578767506 | 0.871431687       | 0.00682799  | 0.01365598    | TRUE            | 0.03061532  | 1   | 32  | 0.862203787 | 0.862203787   | FALSE               | oTbx1+/- | oTbx1+/+ | 100       | 0.167302625 | 0.343976779 | 0.343976779   | FALSE           |
|           |                  |       | oTbx1+/- | 11           | 16.98607089 | 3.279767612 | 0.906204785       | 0.219762803 | 0.219762803   | FALSE           |             |     |     |             |               |                     |          |          |           |             |             |               |                 |
|           |                  | 2     | oTbx1+/+ | 20           | 5.617823791 | 1.293061822 | 0.865730567       | 0.009893527 | 0.019787054   | TRUE            | 0.129376135 | 1   | 28  | 0.721778502 | 0.721778502   | FALSE               | oTbx1+/- | oTbx1+/+ | 98        | 0.016064387 | 0.948316451 | 0.948316451   | FALSE           |
|           |                  |       | oTbx1+/- | 10           | 6.108311403 | 1.697112495 | 0.861318188       | 0.079087694 | 0.079087694   | FALSE           |             |     |     |             |               |                     |          |          |           |             |             |               |                 |

| Measurement      | Month | Genotype          | # of samples | Average     | s.e.m       | Shapiro-Wilk test |             |               |                 | Levene test |     |     |             |               | One way ANOVA   |           |                         |    |             | Student t test |             |                   |               |              |     |              |             |               |                 |
|------------------|-------|-------------------|--------------|-------------|-------------|-------------------|-------------|---------------|-----------------|-------------|-----|-----|-------------|---------------|-----------------|-----------|-------------------------|----|-------------|----------------|-------------|-------------------|---------------|--------------|-----|--------------|-------------|---------------|-----------------|
|                  |       |                   |              |             |             | Statistic         | p_value     | p_adj(FDR BH) | Rejects(FDR 5%) | Statistic   | df1 | df2 | p_value     | p_adj(FDR BH) | Rejects(FDR 5%) | Source    | Type III Sum of Squares | df | Mean Square | F              | Sig.        | Sample1           | Sample2       | Statistic    | dof | cohens_d     | p_value     | p_adj(FDR BH) | Rejects(FDR 5%) |
| % open arms time | 1     | PdgfraCre;Tbx1+/+ | 7            | 12.90725421 | 4.103497891 | 0.886610333       | 0.257444394 | 0.386166591   | FALSE           | 0.107045624 | 2   | 20  | 0.898995957 | 0.898995957   | FALSE           | Intercept | 4421.166501             | 1  | 4421.166501 | 26.47361987    | 4.92643E-05 | PdgfraCre;Tbx1+/+ | WT;Tbx1+/flox | -0.090770003 | 14  | -0.045743782 | 0.928961264 | 0.928961264   | FALSE           |
|                  |       | WT;Tbx1+/+        | 7            | 15.44729701 | 4.180055074 | 0.973508997       | 0.922513345 | 0.922513345   | FALSE           |             |     |     |             |               |                 | Genotype  | 24.86679522             | 2  | 12.43339761 | 0.074450271    | 0.928509658 | PdgfraCre;Tbx1+/+ | WT;Tbx1+/+    | -0.43363151  | 12  | -0.231785792 | 0.672249124 | 0.928961264   | FALSE           |
|                  |       | WT;Tbx1+/flox     | 9            | 13.53137901 | 5.135617804 | 0.770175921       | 0.009280317 | 0.02784095    | TRUE            |             |     |     |             |               |                 | Error     | 3340.054381             | 20 | 167.0027191 |                |             | WT;Tbx1+/flox     | WT;Tbx1+/+    | -0.277229778 | 14  | -0.139710676 | 0.785655127 | 0.928961264   | FALSE           |
|                  | 2     | PdgfraCre;Tbx1+/+ | 8            | 7.962568057 | 2.541302393 | 0.9223745         | 0.449425688 | 0.674138532   | FALSE           | 1.779086372 | 2   | 17  | 0.19881424  | 0.19881424    | FALSE           | Intercept | 563.5759562             | 1  | 563.5759562 | 18.85031974    | 0.000443371 | PdgfraCre;Tbx1+/+ | WT;Tbx1+/flox | 1.934686976  | 12  | 1.044850385  | 0.076951997 | 0.126596757   | FALSE           |
|                  |       | WT;Tbx1+/+        | 6            | 6.17210563  | 1.907847722 | 0.972621635       | 0.90955982  | 0.90955982    | FALSE           |             |     |     |             |               |                 | Genotype  | 127.1072061             | 2  | 63.55360307 | 2.125721876    | 0.14997335  | PdgfraCre;Tbx1+/+ | WT;Tbx1+/+    | 0.529258771  | 12  | 0.285832405  | 0.606278344 | 0.606278344   | FALSE           |
|                  |       | WT;Tbx1+/flox     | 6            | 1.937216264 | 1.116534507 | 0.751259955       | 0.02049345  | 0.061480349   | FALSE           |             |     |     |             |               |                 | Error     | 508.2561668             | 17 | 29.89742157 |                |             | WT;Tbx1+/flox     | WT;Tbx1+/+    | -1.915762576 | 10  | -1.106066039 | 0.084397838 | 0.126596757   | FALSE           |

| Figure    | Measurement       | Month | Genotype | # of samples | Average     | s.e.m       | Shapiro-Wilk test |             |               |                 | Levene test |     |     |             |               | Student t test  |          |          |             |     |             |             |               |                 |
|-----------|-------------------|-------|----------|--------------|-------------|-------------|-------------------|-------------|---------------|-----------------|-------------|-----|-----|-------------|---------------|-----------------|----------|----------|-------------|-----|-------------|-------------|---------------|-----------------|
|           |                   |       |          |              |             |             | Statistic         | p_value     | p_adj(FDR BH) | Rejects(FDR 5%) | Statistic   | df1 | df2 | p_value     | p_adj(FDR BH) | Rejects(FDR 5%) | Sample1  | Sample2  | Statistic   | dof | cohens_d    | p_value     | p_adj(FDR BH) | Rejects(FDR 5%) |
| Figure 7B | % open arm visits | 1     | oTbx1+/+ | 23           | 38.76689665 | 3.457186322 | 0.959194931       | 0.447303171 | 0.472928936   | FALSE           | 0.034575631 | 1   | 32  | 0.853661423 | 0.853661423   | FALSE           | oTbx1+/- | oTbx1+/+ | 1.741236711 | 32  | 0.638317885 | 0.091249849 | 0.091249849   | FALSE           |
|           |                   |       | oTbx1+/- | 11           | 48.92821047 | 4.328945934 | 0.935843176       | 0.472928936 | 0.472928936   | FALSE           |             |     |     |             |               |                 |          |          |             |     |             |             |               |                 |
|           |                   | 2     | oTbx1+/+ | 20           | 16.20798761 | 2.580004845 | 0.933143261       | 0.177461607 | 0.339087396   | FALSE           | 0.734877731 | 1   | 28  | 0.398584802 | 0.398584802   | FALSE           | oTbx1+/- | oTbx1+/+ | 0.59246246  | 28  | 0.229459724 | 0.558295668 | 0.558295668   | FALSE           |
|           |                   |       | oTbx1+/- | 10           | 19.18868564 | 4.938885044 | 0.91781454        | 0.339087396 | 0.339087396   | FALSE           |             |     |     |             |               |                 |          |          |             |     |             |             |               |                 |

| Measurement       | Month | Genotype          | # of samples | Average     | s.e.m       | Shapiro-Wilk test |             |               |                 | Levene test |     |     |             |               | One way ANOVA   |             |                         |             |             | Student t test |                   |                   |               |             |              |              |             |               |                 |
|-------------------|-------|-------------------|--------------|-------------|-------------|-------------------|-------------|---------------|-----------------|-------------|-----|-----|-------------|---------------|-----------------|-------------|-------------------------|-------------|-------------|----------------|-------------------|-------------------|---------------|-------------|--------------|--------------|-------------|---------------|-----------------|
|                   |       |                   |              |             |             | Statistic         | p_value     | p_adj(FDR BH) | Rejects(FDR 5%) | Statistic   | df1 | df2 | p_value     | p_adj(FDR BH) | Rejects(FDR 5%) | Source      | Type III Sum of Squares | df          | Mean Square | F              | Sig.              | Sample1           | Sample2       | Statistic   | dof          | cohens_d     | p_value     | p_adj(FDR BH) | Rejects(FDR 5%) |
| % open arm visits | 1     | PdgfraCre;Tbx1+/+ | 7            | 35.6769162  | 4.664325787 | 0.928344033       | 0.536905413 | 0.536905413   | FALSE           | 0.54245905  | 2   | 20  | 0.589631629 | 0.589631629   | FALSE           | Intercept   | 33992.03738             | 1           | 33992.03738 | 114.4766364    | 1.00324E-09       | PdgfraCre;Tbx1+/+ | WT;Tbx1+/flox | -0.38767913 | 14           | -0.195371917 | 0.704083822 | 0.851686321   | FALSE           |
|                   |       | WT;Tbx1+/+        | 7            | 41.14160143 | 5.028883164 | 0.831111044       | 0.081981393 | 0.219437109   | FALSE           |             |     |     |             |               | Genotype        | 109.0958965 | 2                       | 54.54794824 | 0.183703776 | 0.833570659    | PdgfraCre;Tbx1+/+ | WT;Tbx1+/+        | -0.796719857  | 12          | -0.425864677 | 0.441092294  | 0.851686321 | FALSE         |                 |
|                   |       | WT;Tbx1+/flox     | 9            | 39.32322217 | 7.418792132 | 0.877086869       | 0.146291406 | 0.219437109   | FALSE           |             |     |     |             |               | Error           | 5938.685561 | 20                      | 296.934278  |             |                | WT;Tbx1+/flox     | WT;Tbx1+/+        | -0.190455488  | 14          | -0.095980544 | 0.851686321  | 0.851686321 | FALSE         |                 |
|                   | 2     | PdgfraCre;Tbx1+/+ | 8            | 20.47904805 | 3.951856074 | 0.921801353       | 0.444650175 | 0.666975262   | FALSE           | 0.062288917 | 2   | 17  | 0.939824807 | 0.939824807   | FALSE           | Intercept   | 4860.798667             | 1           | 4860.798667 | 38.36512241    | 9.80937E-06       | PdgfraCre;Tbx1+/+ | WT;Tbx1+/flox | 1.794257938 | 12           | 0.969010037  | 0.097985827 | 0.293957482   | FALSE           |
|                   |       | WT;Tbx1+/+        | 6            | 16.68154542 | 5.036940952 | 0.970955927       | 0.898793324 | 0.898793324   | FALSE           |             |     |     |             |               | Genotype        | 375.5691249 | 2                       | 187.7845625 | 1.482138681 | 0.255070525    | PdgfraCre;Tbx1+/+ | WT;Tbx1+/+        | 0.602275965   | 12          | 0.325266196  | 0.558199622  | 0.558199622 | FALSE         |                 |
|                   |       | WT;Tbx1+/flox     | 6            | 10.03968254 | 4.156071184 | 0.906492643       | 0.413726943 | 0.666975262   | FALSE           |             |     |     |             |               | Error           | 2153.872376 | 17                      | 126.698375  |             |                | WT;Tbx1+/flox     | WT;Tbx1+/+        | -1.017097195  | 10          | -0.587221339 | 0.33308331   | 0.499624965 | FALSE         |                 |





| Figure    | Measurement         | Month | Time (min) | Genotype | # of samples | Average     | s.e.m       | Shapiro-Wilk test |             |               |                 | Levene test |     |     |             |               | Linear Mixed Model |                 |             |     | Mann-Whitney U test |             |             |          |             |             |            |               |                 |
|-----------|---------------------|-------|------------|----------|--------------|-------------|-------------|-------------------|-------------|---------------|-----------------|-------------|-----|-----|-------------|---------------|--------------------|-----------------|-------------|-----|---------------------|-------------|-------------|----------|-------------|-------------|------------|---------------|-----------------|
|           |                     |       |            |          |              |             |             | Statistic         | p_value     | p_adj(FDR BH) | Rejects(FDR 5%) | Statistic   | df1 | df2 | p_value     | p_adj(FDR BH) | Rejects(FDR 5%)    | Source          | F           | df1 | df2                 | Sig.        | Sample1     | Sample2  | Statistic   | R (Z score) | p_value    | p_adj(FDR BH) | Rejects(FDR 5%) |
| Figure 8C | Total Distance (cm) | 1     | 5          | oTbx1+/+ | 24           | 523.3911589 | 30.20140117 | 0.975883028       | 0.809668571 | 0.809668571   | FALSE           | 4.130581659 | 1   | 33  | 0.050226926 | 0.301361554   | FALSE              | Corrected Model | 14.18810262 | 11  | 198                 | 0           | oTbx1+/-    | oTbx1+/+ | 125         | 0.042043748 | 0.82012655 | 0.902572012   | FALSE           |
|           |                     |       |            | oTbx1+/- | 11           | 575.0133513 | 81.09884483 | 0.924914551       | 0.361718736 | 0.569470319   | FALSE           |             |     |     |             |               |                    | Genotype        | 0.631374662 |     |                     |             | 1           | 198      | 0.4278029   |             |            |               |                 |
|           |                     |       | 10         | oTbx1+/+ | 24           | 428.858175  | 25.3219597  | 0.947354113       | 0.237276704 | 0.569470319   | FALSE           | 1.663209327 | 1   | 33  | 0.206136149 | 0.412272297   | FALSE              | Time            | 27.84739692 | 5   | 198                 | 0           | oTbx1+/-    | oTbx1+/+ | 126         | 0.036037499 | 0.84744042 | 0.902572012   | FALSE           |
|           |                     |       |            | oTbx1+/- | 11           | 463.1100966 | 54.68330524 | 0.916262967       | 0.288732783 | 0.569470319   | FALSE           |             |     |     |             |               |                    | Genotype * Time | 0.955127959 |     |                     |             | 5           | 198      | 0.446565974 |             |            |               |                 |
|           |                     |       | 15         | oTbx1+/+ | 24           | 353.2098723 | 29.23769273 | 0.966833314       | 0.589787776 | 0.707745332   | FALSE           | 0.140317736 | 1   | 33  | 0.710361842 | 0.896645927   | FALSE              | oTbx1+/-        | oTbx1+/+    | 128 | 0.024024999         | 0.902572012 | 0.902572012 | FALSE    |             |             |            |               |                 |
|           |                     |       |            | oTbx1+/- | 11           | 411.012008  | 55.7960521  | 0.755590857       | 0.002459007 | 0.029508078   | TRUE            |             |     |     |             |               |                    |                 |             |     |                     |             |             |          |             |             |            |               |                 |
|           |                     |       | 20         | oTbx1+/+ | 24           | 323.8313083 | 27.24334579 | 0.975754462       | 0.806709631 | 0.809668571   | FALSE           | 0.017135892 | 1   | 33  | 0.896645927 | 0.896645927   | FALSE              | oTbx1+/-        | oTbx1+/+    | 120 | 0.072074997         | 0.687299671 | 0.902572012 | FALSE    |             |             |            |               |                 |
|           |                     |       |            | oTbx1+/- | 11           | 349.0746296 | 38.67701388 | 0.902850991       | 0.200221378 | 0.569470319   | FALSE           |             |     |     |             |               |                    |                 |             |     |                     |             |             |          |             |             |            |               |                 |
|           |                     |       | 25         | oTbx1+/+ | 24           | 264.9099236 | 32.94277932 | 0.903535486       | 0.02559625  | 0.153577498   | FALSE           | 0.040522424 | 1   | 33  | 0.841698265 | 0.896645927   | FALSE              | oTbx1+/-        | oTbx1+/+    | 93  | 0.23424374          | 0.173954599 | 0.902572012 | FALSE    |             |             |            |               |                 |
|           |                     |       |            | oTbx1+/- | 11           | 339.7488583 | 47.44333904 | 0.940451418       | 0.525819716 | 0.701092954   | FALSE           |             |     |     |             |               |                    |                 |             |     |                     |             |             |          |             |             |            |               |                 |
|           |                     |       | 30         | oTbx1+/+ | 24           | 246.8655593 | 33.32994361 | 0.947492768       | 0.238941106 | 0.569470319   | FALSE           | 2.249666174 | 1   | 33  | 0.143150583 | 0.412272297   | FALSE              | oTbx1+/-        | oTbx1+/+    | 111 | -0.126131245        | 0.472220258 | 0.902572012 | FALSE    |             |             |            |               |                 |
|           |                     |       |            | oTbx1+/- | 11           | 201.5505166 | 37.02036109 | 0.926826438       | 0.37964688  | 0.569470319   | FALSE           |             |     |     |             |               |                    |                 |             |     |                     |             |             |          |             |             |            |               |                 |

| Measurement         | Month | Time (min) | Genotype          | # of samples | Average     | s.e.m       | Shapiro-Wilk test |             |               |                 | Levene test |     |     |             |               | Repeated Measures ANOVA |                         |                    |              |             | Student t test |             |                   |                   |               |              |             |               |                 |             |       |
|---------------------|-------|------------|-------------------|--------------|-------------|-------------|-------------------|-------------|---------------|-----------------|-------------|-----|-----|-------------|---------------|-------------------------|-------------------------|--------------------|--------------|-------------|----------------|-------------|-------------------|-------------------|---------------|--------------|-------------|---------------|-----------------|-------------|-------|
|                     |       |            |                   |              |             |             | Statistic         | p_value     | p_adj(FDR BH) | Rejects(FDR 5%) | Statistic   | df1 | df2 | p_value     | p_adj(FDR BH) | Rejects(FDR 5%)         | Type III Sum of Squares | df                 | Mean Square  | F           | Sig.           | Sample1     | Sample2           | Statistic         | dof           | cohens_d     | p_value     | p_adj(FDR BH) | Rejects(FDR 5%) |             |       |
| Total Distance (cm) | 1     | 5          | PdgfraCre;Tbx1+/+ | 8            | 620.0439824 | 61.18380332 | 0.896772958       | 0.270160506 | 0.686126804   | FALSE           | 0.78676576  | 2   | 21  | 0.468282323 | 0.702423485   | FALSE                   | <b>Within subjects</b>  |                    |              |             |                |             | PdgfraCre;Tbx1+/+ | WT;Tbx1+/flox     | 1.782324381   | 15           | 0.866053977 | 0.094944335   | 0.18988867      | FALSE       |       |
|                     |       |            | WT;Tbx1+/+        | 7            | 441.6039626 | 47.42794277 | 0.93556056        | 0.599115546 | 0.898673318   | FALSE           |             |     |     |             |               |                         | Time                    | Greenhouse-Geisser | 1232066.871  | 3.551512016 | 346913.3331    | 18.43930669 | 6.42253E-10       | PdgfraCre;Tbx1+/+ | WT;Tbx1+/+    | 2.254227774  | 13          | 1.166673712   | 0.042077619     | 0.182512156 | FALSE |
|                     |       |            | WT;Tbx1+/flox     | 9            | 501.0898018 | 31.91778323 | 0.918522745       | 0.380149455 | 0.760298911   | FALSE           |             |     |     |             |               |                         | Time * Genotype         | Greenhouse-Geisser | 149400.5872  | 7.103024031 | 21033.37769    | 1.11797635  | 0.361061454       | WT;Tbx1+/flox     | WT;Tbx1+/+    | 1.0781018    | 14          | 0.543312238   | 0.299214264     | 0.414296673 | FALSE |
|                     |       | 10         | PdgfraCre;Tbx1+/+ | 8            | 528.1841483 | 47.57087669 | 0.949171774       | 0.702877111 | 0.973214461   | FALSE           | 1.114125751 | 2   | 21  | 0.346839968 | 0.693679937   | FALSE                   | Error(Time)             | Greenhouse-Geisser | 1403165.787  | 74.58175233 | 18813.79484    |             |                   | PdgfraCre;Tbx1+/+ | WT;Tbx1+/flox | 2.69065136   | 15          | 1.307421554   | 0.016770132     | 0.182512156 | FALSE |
|                     |       |            | WT;Tbx1+/+        | 7            | 384.9748501 | 26.01161759 | 0.970333          | 0.900838417 | 0.980892361   | FALSE           |             |     |     |             |               |                         | <b>Between subjects</b> |                    |              |             |                |             | PdgfraCre;Tbx1+/+ | WT;Tbx1+/+        | 2.532927569   | 13           | 1.31091456  | 0.024986314   | 0.182512156     | FALSE       |       |
|                     |       |            | WT;Tbx1+/flox     | 9            | 374.699896  | 33.33231151 | 0.977856565       | 0.952350694 | 0.980892361   | FALSE           |             |     |     |             |               |                         | Intercept               |                    | 18280351.96  | 1           | 18280351.96    | 417.5782475 | 2.43882E-15       | WT;Tbx1+/flox     | WT;Tbx1+/+    | -0.231693882 | 14          | -0.116762741  | 0.820128066     | 0.820128066 | FALSE |
|                     |       | 15         | PdgfraCre;Tbx1+/+ | 8            | 435.548186  | 56.01819145 | 0.984272937       | 0.980892361 | 0.980892361   | FALSE           | 2.264993593 | 2   | 21  | 0.12860899  | 0.678212575   | FALSE                   | Genotype                |                    | 479372.5079  | 2           | 239686.254     | 5.475155296 | 0.012198718       | PdgfraCre;Tbx1+/+ | WT;Tbx1+/flox | 1.870796877  | 15          | 0.909043883   | 0.081011856     | 0.182512156 | FALSE |
|                     |       |            | WT;Tbx1+/+        | 7            | 331.29903   | 29.99137947 | 0.789411464       | 0.03213434  | 0.431236082   | FALSE           |             |     |     |             |               |                         | Error                   |                    | 919318.4597  | 21          | 43777.06951    |             |                   | PdgfraCre;Tbx1+/+ | WT;Tbx1+/+    | 1.571756012  | 13          | 0.813461019   | 0.140019642     | 0.22912305  | FALSE |
|                     |       |            | WT;Tbx1+/flox     | 9            | 297.0620262 | 48.93223185 | 0.905661169       | 0.286676525 | 0.686126804   | FALSE           |             |     |     |             |               |                         | WT;Tbx1+/flox           | WT;Tbx1+/+         | -0.554475257 | 14          | -0.279429264   | 0.588002519 | 0.661502834       | FALSE             |               |              |             |               |                 |             |       |
|                     |       | 20         | PdgfraCre;Tbx1+/+ | 8            | 411.8585995 | 57.63072458 | 0.973883362       | 0.926616722 | 0.980892361   | FALSE           | 1.597337999 | 2   | 21  | 0.226070858 | 0.678212575   | FALSE                   | PdgfraCre;Tbx1+/+       | WT;Tbx1+/flox      | 1.92146405   | 15          | 0.933663704    | 0.073882743 | 0.182512156       | FALSE             |               |              |             |               |                 |             |       |
|                     |       |            | WT;Tbx1+/+        | 7            | 260.7565684 | 42.47375038 | 0.889114132       | 0.270074414 | 0.686126804   | FALSE           |             |     |     |             |               |                         | PdgfraCre;Tbx1+/+       | WT;Tbx1+/+         | 2.057488232  | 13          | 1.064851326    | 0.060276832 | 0.182512156       | FALSE             |               |              |             |               |                 |             |       |
|                     |       |            | WT;Tbx1+/flox     | 9            | 294.6429583 | 26.46424959 | 0.856295547       | 0.087368002 | 0.524208011   | FALSE           |             |     |     |             |               |                         | WT;Tbx1+/flox           | WT;Tbx1+/+         | 0.70823831   | 14          | 0.35691856     | 0.490422016 | 0.630542591       | FALSE             |               |              |             |               |                 |             |       |
|                     |       | 25         | PdgfraCre;Tbx1+/+ | 8            | 337.0979663 | 67.94142154 | 0.902611055       | 0.304945246 | 0.686126804   | FALSE           | 0.479360415 | 2   | 21  | 0.62579012  | 0.750948144   | FALSE                   | PdgfraCre;Tbx1+/+       | WT;Tbx1+/flox      | 1.967124166  | 15          | 0.955850532    | 0.06794745  | 0.182512156       | FALSE             |               |              |             |               |                 |             |       |
|                     |       |            | WT;Tbx1+/+        | 7            | 280.8983661 | 57.58848895 | 0.918866143       | 0.460635174 | 0.763439422   | FALSE           |             |     |     |             |               |                         | PdgfraCre;Tbx1+/+       | WT;Tbx1+/+         | 0.620765095  | 13          | 0.321276459    | 0.545484347 | 0.654581216       | FALSE             |               |              |             |               |                 |             |       |
|                     |       |            | WT;Tbx1+/flox     | 9            | 188.3073192 | 38.18211176 | 0.832731267       | 0.04791512  | 0.431236082   | FALSE           |             |     |     |             |               |                         | WT;Tbx1+/flox           | WT;Tbx1+/+         | -1.390976099 | 14          | -0.700986064   | 0.185945611 | 0.278918417       | FALSE             |               |              |             |               |                 |             |       |
|                     |       | 30         | PdgfraCre;Tbx1+/+ | 8            | 285.4238129 | 54.60920401 | 0.924397037       | 0.466546314 | 0.763439422   | FALSE           | 0.105755822 | 2   | 21  | 0.900120365 | 0.900120365   | FALSE                   | PdgfraCre;Tbx1+/+       | WT;Tbx1+/flox      | 1.663575002  | 15          | 0.808352151    | 0.116943757 | 0.210498763       | FALSE             |               |              |             |               |                 |             |       |
|                     |       |            | WT;Tbx1+/+        | 7            | 310.8749546 | 62.46942788 | 0.966178335       | 0.869648503 | 0.980892361   | FALSE           |             |     |     |             |               |                         | PdgfraCre;Tbx1+/+       | WT;Tbx1+/+         | -0.308231337 | 13          | -0.159524872   | 0.762789645 | 0.807659625       | FALSE             |               |              |             |               |                 |             |       |
|                     |       |            | WT;Tbx1+/flox     | 9            | 162.8064708 | 49.74066212 | 0.878647793       | 0.15195339  | 0.683790257   | FALSE           |             |     |     |             |               |                         | WT;Tbx1+/flox           | WT;Tbx1+/+         | -1.879743998 | 14          | -0.947301933   | 0.081116514 | 0.182512156       | FALSE             |               |              |             |               |                 |             |       |

| Figure    | Measurement         | Month | Time (min) | Genotype | # of samples | Average     | s.e.m       | Shapiro-Wilk test |             |               |                 | Levene test |     |     |             |               | Repeated Measures ANOVA |                         |                    |             |             | Student t test |             |             |              |     |              |             |               |                 |
|-----------|---------------------|-------|------------|----------|--------------|-------------|-------------|-------------------|-------------|---------------|-----------------|-------------|-----|-----|-------------|---------------|-------------------------|-------------------------|--------------------|-------------|-------------|----------------|-------------|-------------|--------------|-----|--------------|-------------|---------------|-----------------|
|           |                     |       |            |          |              |             |             | Statistic         | p_value     | p_adj(FDR BH) | Rejects(FDR 5%) | Statistic   | df1 | df2 | p_value     | p_adj(FDR BH) | Rejects(FDR 5%)         | Type III Sum of Squares | df                 | Mean Square | F           | Sig.           | Sample1     | Sample2     | Statistic    | dof | cohens_d     | p_value     | p_adj(FDR BH) | Rejects(FDR 5%) |
| Figure 8D | Total Distance (cm) | 2     | 5          | oTbx1+/+ | 20           | 582.5324674 | 39.81366145 | 0.961805113       | 0.580510261 | 0.964595553   | FALSE           | 2.027577552 | 1   | 28  | 0.165516111 | 0.496548332   | FALSE                   | <b>Within Subjects</b>  |                    |             |             |                | oTbx1+/-    | oTbx1+/+    | -0.200159227 | 28  | -0.077521335 | 0.842802741 | 0.9640554     | FALSE           |
|           |                     |       |            | oTbx1+/- | 10           | 565.9321735 | 87.02480436 | 0.952194518       | 0.694501499 | 0.964595553   | FALSE           |             |     |     |             |               |                         | Time                    | Greenhouse-Geisser | 1995853.076 | 3.660164031 | 545290.6098    | 26.86051187 | 1.71481E-14 |              |     |              |             |               |                 |
|           |                     |       | 10         | oTbx1+/+ | 20           | 465.0152343 | 28.92161572 | 0.976249885       | 0.877119898 | 0.964595553   | FALSE           | 3.110488944 | 1   | 28  | 0.088700281 | 0.496548332   | FALSE                   | <b>Time * Genotype</b>  |                    |             |             |                | oTbx1+/-    | oTbx1+/+    | 0.243505064  | 28  | 0.094309106  | 0.809389409 | 0.9640554     | FALSE           |
|           |                     |       |            | oTbx1+/- | 10           | 478.4165818 | 52.4441209  | 0.848827274       | 0.056251555 | 0.675018657   | FALSE           |             |     |     |             |               |                         | Error(Time)             | Greenhouse-Geisser | 2080522.01  | 102.4845929 | 20300.82719    |             |             |              |     |              |             |               |                 |
|           |                     |       | 15         | oTbx1+/+ | 20           | 361.7175911 | 28.74548525 | 0.979861932       | 0.932306056 | 0.964595553   | FALSE           | 0.864912718 | 1   | 28  | 0.360316817 | 0.530231581   | FALSE                   | <b>Between Subjects</b> |                    |             |             |                | oTbx1+/-    | oTbx1+/+    | 0.892772198  | 28  | 0.345769186  | 0.379588252 | 0.9640554     | FALSE           |
|           |                     |       |            | oTbx1+/- | 10           | 409.8879946 | 50.49069356 | 0.979893494       | 0.964595553 | 0.964595553   | FALSE           |             |     |     |             |               |                         | Intercept               |                    | 23339048.01 | 1           | 23339048.01    | 306.4591211 | 1.2929E-16  |              |     |              |             |               |                 |
|           |                     |       | 20         | oTbx1+/+ | 20           | 348.215865  | 27.97211407 | 0.978671917       | 0.915818525 | 0.964595553   | FALSE           | 0.608602693 | 1   | 28  | 0.441859651 | 0.530231581   | FALSE                   | <b>Genotype</b>         |                    |             |             |                | oTbx1+/-    | oTbx1+/+    | -0.897736865 | 28  | -0.347691993 | 0.376980718 | 0.9640554     | FALSE           |
|           |                     |       |            | oTbx1+/- | 10           | 300.6010342 | 50.30866599 | 0.93172014        | 0.465023493 | 0.964595553   | FALSE           |             |     |     |             |               |                         | Error                   |                    | 2132399.721 | 28          | 76157.13288    |             |             |              |     |              |             |               |                 |
|           |                     |       | 25         | oTbx1+/+ | 20           | 299.1055367 | 24.94704284 | 0.974019572       | 0.836412834 | 0.964595553   | FALSE           | 0.876820379 | 1   | 28  | 0.357080786 | 0.530231581   | FALSE                   | <b>oTbx1+/-</b>         |                    |             |             |                | oTbx1+/-    | oTbx1+/+    | -0.703264717 | 28  | -0.272373254 | 0.487697769 | 0.9640554     | FALSE           |
|           |                     |       |            | oTbx1+/- | 10           | 264.0208722 | 50.34200893 | 0.938023496       | 0.531237334 | 0.964595553   | FALSE           |             |     |     |             |               |                         |                         |                    |             |             |                |             |             |              |     |              |             |               |                 |
|           |                     |       | 30         | oTbx1+/+ | 20           | 255.362162  | 39.42744784 | 0.949277247       | 0.356252313 | 0.964595553   | FALSE           | 0.036907756 | 1   | 28  | 0.849039501 | 0.849039501   | FALSE                   | <b>oTbx1+/-</b>         |                    |             |             |                | oTbx1+/-    | oTbx1+/+    | -0.045470044 | 28  | -0.017610472 | 0.9640554   | 0.9640554     | FALSE           |
|           |                     |       |            | oTbx1+/- | 10           | 252.3293176 | 51.6114029  | 0.940717398       | 0.56102342  | 0.964595553   | FALSE           |             |     |     |             |               |                         |                         |                    |             |             |                |             |             |              |     |              |             |               |                 |

| Measurement         | Month | Time (min) | Genotype          | # of samples | Average     | s.e.m       | Shapiro-Wilk test |             |               |                 | Levene test |     |     |             |               | Repeated Measures ANOVA |                          |                    |              |    | Student t test |                   |               |                   |               |              |             |               |                 |             |       |  |  |
|---------------------|-------|------------|-------------------|--------------|-------------|-------------|-------------------|-------------|---------------|-----------------|-------------|-----|-----|-------------|---------------|-------------------------|--------------------------|--------------------|--------------|----|----------------|-------------------|---------------|-------------------|---------------|--------------|-------------|---------------|-----------------|-------------|-------|--|--|
|                     |       |            |                   |              |             |             | Statistic         | p_value     | p_adj(FDR BH) | Rejects(FDR 5%) | Statistic   | df1 | df2 | p_value     | p_adj(FDR BH) | Rejects(FDR 5%)         | Type III Sum of Squares  | df                 | Mean Square  | F  | Sig.           | Sample1           | Sample2       | Statistic         | dof           | cohens_d     | p_value     | p_adj(FDR BH) | Rejects(FDR 5%) |             |       |  |  |
| Total Distance (cm) | 2     | 5          | PdgfraCre;Tbx1+/+ | 8            | 675.3377481 | 67.21069573 | 0.960970017       | 0.819288618 | 0.90097253    | FALSE           | 0.513944781 | 2   | 17  | 0.60713361  | 0.845882843   | FALSE                   | <b>Within subjects</b>   |                    |              |    |                | PdgfraCre;Tbx1+/+ | WT;Tbx1+/flox | 2.318778914       | 12            | 1.25228374   | 0.038853127 | 0.145180864   | FALSE           |             |       |  |  |
|                     |       |            | WT;Tbx1+/+        | 6            | 576.9360505 | 60.27675931 | 0.947046048       | 0.716310322 | 0.90097253    | FALSE           |             |     |     |             |               |                         | Time                     | Sphericity Assumed | 1366149.157  | 5  | 273229.8314    | 19.2608065        | 9.05321E-13   | PdgfraCre;Tbx1+/+ | WT;Tbx1+/+    | 1.049097419  | 12          | 0.566577362   | 0.314803416     | 0.404747249 | FALSE |  |  |
|                     |       |            | WT;Tbx1+/flox     | 6            | 464.38851   | 54.01971119 | 0.932193779       | 0.597146871 | 0.90097253    | FALSE           |             |     |     |             |               |                         | Time * Genotype          | Sphericity Assumed | 56104.56039  | 10 | 5610.456039    | 0.395498206       | 0.94529822    | WT;Tbx1+/flox     | WT;Tbx1+/+    | -1.390491666 | 10          | -0.802800737  | 0.194547247     | 0.291820871 | FALSE |  |  |
|                     |       | 10         | PdgfraCre;Tbx1+/+ | 8            | 563.3077705 | 39.36525666 | 0.91827703        | 0.416039464 | 0.90097253    | FALSE           | 0.142545825 | 2   | 17  | 0.86817344  | 0.86817344    | FALSE                   | <b>Error(Time)</b>       |                    |              |    |                | PdgfraCre;Tbx1+/+ | WT;Tbx1+/flox | 3.212491801       | 12            | 1.734943863  | 0.007457649 | 0.134237677   | FALSE           |             |       |  |  |
|                     |       |            | WT;Tbx1+/+        | 6            | 423.8291928 | 36.86712279 | 0.939986406       | 0.659089302 | 0.90097253    | FALSE           |             |     |     |             |               |                         | <b>Between subjects</b>  | Sphericity Assumed | 1205792.482  | 85 | 14185.7939     |                   |               |                   |               |              |             |               |                 |             |       |  |  |
|                     |       |            | WT;Tbx1+/flox     | 6            | 375.1445608 | 42.57179879 | 0.896122527       | 0.351518024 | 0.90097253    | FALSE           |             |     |     |             |               |                         | Intercept                |                    | 16804988     | 1  | 16804988       | 552.5624347       | 2.10342E-14   | PdgfraCre;Tbx1+/+ | WT;Tbx1+/+    | 2.504995321  | 12          | 1.352852094   | 0.027660714     | 0.145180864 | FALSE |  |  |
|                     |       | 15         | PdgfraCre;Tbx1+/+ | 8            | 412.9964819 | 53.1536322  | 0.970729632       | 0.903671601 | 0.903671601   | FALSE           | 1.538099909 | 2   | 17  | 0.243233282 | 0.518147214   | FALSE                   | <b>Genotype</b>          |                    |              |    |                | WT;Tbx1+/flox     | WT;Tbx1+/+    | -0.864483291      | 10            | -0.499109661 | 0.407581081 | 0.489097297   | FALSE           |             |       |  |  |
|                     |       |            | WT;Tbx1+/+        | 6            | 384.9906002 | 24.8709437  | 0.960076551       | 0.820330406 | 0.90097253    | FALSE           |             |     |     |             |               |                         | Error                    |                    | 579823.9342  | 2  | 289911.9671    | 9.532554405       | 0.001673302   | PdgfraCre;Tbx1+/+ | WT;Tbx1+/flox | 1.951155687  | 12          | 1.053744506   | 0.074776993     | 0.154898089 | FALSE |  |  |
|                     |       |            | WT;Tbx1+/flox     | 6            | 270.0727277 | 45.65896481 | 0.885730035       | 0.296415795 | 0.90097253    | FALSE           |             |     |     |             |               |                         |                          |                    | 517018.1288  | 17 | 30412.83111    |                   |               |                   |               |              |             |               |                 |             |       |  |  |
|                     |       | 20         | PdgfraCre;Tbx1+/+ | 8            | 383.3626534 | 47.27633929 | 0.962488762       | 0.833447547 | 0.90097253    | FALSE           | 0.356989008 | 2   | 17  | 0.704902369 | 0.845882843   | FALSE                   | <b>WT;Tbx1+/flox</b>     |                    |              |    |                | PdgfraCre;Tbx1+/+ | WT;Tbx1+/flox | 1.870093843       | 12            | 1.009966107  | 0.086054494 | 0.154898089   | FALSE           |             |       |  |  |
|                     |       |            | WT;Tbx1+/+        | 6            | 392.8098267 | 35.00674422 | 0.93743225        | 0.638585233 | 0.90097253    | FALSE           |             |     |     |             |               |                         | PdgfraCre;Tbx1+/+        | WT;Tbx1+/+         | -0.150587648 | 12 | -0.081326625   | 0.882802665       | 0.882802665   | FALSE             |               |              |             |               |                 |             |       |  |  |
|                     |       |            | WT;Tbx1+/flox     | 6            | 256.7595188 | 45.97104537 | 0.889647485       | 0.316344886 | 0.90097253    | FALSE           |             |     |     |             |               |                         | WT;Tbx1+/flox            | WT;Tbx1+/+         | -2.354527304 | 10 | -1.359386973   | 0.040328018       | 0.145180864   | FALSE             |               |              |             |               |                 |             |       |  |  |
|                     |       | 25         | PdgfraCre;Tbx1+/+ | 8            | 364.6078814 | 41.60013821 | 0.951382549       | 0.72516182  | 0.90097253    | FALSE           | 1.850493244 | 2   | 17  | 0.187452819 | 0.518147214   | FALSE                   | <b>PdgfraCre;Tbx1+/+</b> |                    |              |    |                | PdgfraCre;Tbx1+/+ | WT;Tbx1+/flox | 2.664033886       | 12            | 1.438742736  | 0.02063703  | 0.145180864   | FALSE           |             |       |  |  |
|                     |       |            | WT;Tbx1+/+        | 6            | 296.9929018 | 29.92382991 | 0.964127822       | 0.8509185   | 0.90097253    | FALSE           |             |     |     |             |               |                         | PdgfraCre;Tbx1+/+        | WT;Tbx1+/+         | 1.232745856  | 12 | 0.665758853    | 0.241276061       | 0.334074546   | FALSE             |               |              |             |               |                 |             |       |  |  |
|                     |       |            | WT;Tbx1+/flox     | 6            | 213.881712  | 34.05386391 | 0.910326291       | 0.438546447 | 0.90097253    | FALSE           |             |     |     |             |               |                         | WT;Tbx1+/flox            | WT;Tbx1+/+         | -1.833339471 | 10 | -1.058479037   | 0.096646438       | 0.158148716   | FALSE             |               |              |             |               |                 |             |       |  |  |
|                     |       | 30         | PdgfraCre;Tbx1+/+ | 8            | 325.6745739 | 75.49961398 | 0.953377125       | 0.745179396 | 0.90097253    | FALSE           | 1.463867976 | 2   | 17  | 0.259073607 | 0.518147214   | FALSE                   | <b>PdgfraCre;Tbx1+/+</b> |                    |              |    |                | PdgfraCre;Tbx1+/+ | WT;Tbx1+/flox | 1.942251174       | 12            | 1.048935519  | 0.075945879 | 0.154898089   | FALSE           |             |       |  |  |
|                     |       |            | WT;Tbx1+/+        | 6            | 277.1861365 | 55.16889694 | 0.929847805       | 0.578927051 | 0.90097253    | FALSE           |             |     |     |             |               |                         | PdgfraCre;Tbx1+/+        | WT;Tbx1+/+         | 0.485421275  | 12 | 0.262157451    | 0.636119338       | 0.715634256   | FALSE             |               |              |             |               |                 |             |       |  |  |
|                     |       |            | WT;Tbx1+/flox     | 6            | 139.7883048 | 43.83595818 | 0.905323563       | 0.40635214  | 0.90097253    | FALSE           |             |     |     |             |               |                         | WT;Tbx1+/flox            | WT;Tbx1+/+         | -1.949896567 | 10 | -1.125773308   | 0.079761998       | 0.154898089   | FALSE             |               |              |             |               |                 |             |       |  |  |

| Figure    | Measurement | Genotype | # of Samples | Average     | s.e.m       | Shapiro-Wilk test |          | Levene test |     |      | Linear Mixed Model |                        |             |     | Fisher's r-to-Z transformation |             |                                     |      |             |                       |                           |              |                       |
|-----------|-------------|----------|--------------|-------------|-------------|-------------------|----------|-------------|-----|------|--------------------|------------------------|-------------|-----|--------------------------------|-------------|-------------------------------------|------|-------------|-----------------------|---------------------------|--------------|-----------------------|
|           |             |          |              |             |             | Statistic         | p_value  | Statistic   | df1 | df2  | p_value            | factor                 | F           | df1 | df2                            | p_value     | Measurement                         | N    | Pearson's r | p_value (correlation) | Z transformed correlation | Z statistic  | p_value (Z statistic) |
| Figure 9B | g-ratio     | oTbx1+/- | 4423         | 0.742132168 | 0.001178885 | 0.983206272       | 1.62E-22 | 1.670711318 | 1   | 6738 | 0.196207608        | Genotype               | 0.055858571 | 1   | 6736                           | 0.813172794 | g-ratio vs Axon Diameter (oTbx1+/-) | 4423 | 0.626809    | 0.00E+00              | 0.736142587               | -1.466330096 | 0.14255838            |
|           |             | oTbx1+/- | 2317         | 0.736721572 | 0.001594201 | 0.98563242        | 1.56E-14 |             |     |      |                    | Axon Diameter          | 4117.938128 | 1   | 6736                           | 0           | g-ratio vs Axon Diameter (oTbx1+/-) | 2317 | 0.649115    | 2.53E-277             | 0.773767499               |              |                       |
|           |             |          |              |             |             |                   |          |             |     |      |                    | Genotype:Axon Diameter | 1.497334759 | 1   | 6736                           | 0.22112471  |                                     |      |             |                       |                           |              |                       |

| Figure    | Measurement | Axon Diameter | Genotype | # of samples | Average     | s.e.m       | Shapiro-Wilk test |             |               |                  | Levene test  |     |     |             | LMM (setting session id as random effect) |                  |                                 |             |     | LMM (setting both mouse id and session id as random effects) |             |                                 |             |     | Mann-Whitney U test |             |           |              |             | Mann-Whitney U test (300-1400nm) |                  |           |              |             |               |                  |  |  |  |  |  |  |
|-----------|-------------|---------------|----------|--------------|-------------|-------------|-------------------|-------------|---------------|------------------|--------------|-----|-----|-------------|-------------------------------------------|------------------|---------------------------------|-------------|-----|--------------------------------------------------------------|-------------|---------------------------------|-------------|-----|---------------------|-------------|-----------|--------------|-------------|----------------------------------|------------------|-----------|--------------|-------------|---------------|------------------|--|--|--|--|--|--|
|           |             |               |          |              |             |             | statistic         | p_value     | p_adj(FDR BH) | Rejects (FDR 5%) | Statistic    | df1 | df2 | p_value     | p_adj(FDR BH)                             | Rejects (FDR 5%) | Source                          | F           | df1 | df2                                                          | Sig.        | Source                          | F           | df1 | df2                 | Sig.        | Statistic | R (Z score)  | p_value     | p_adj(FDR BH)                    | Rejects (FDR 5%) | Statistic | R (Z score)  | p_value     | p_adj(FDR BH) | Rejects (FDR 5%) |  |  |  |  |  |  |
| Figure 9C | Axon Number | 200 oTbx1+/+  | oTbx1+/- | 145          | 0.131034483 | 0.035632184 | 0.341078043       | 8.80283E-23 | 5.47732E-22   | TRUE             | 0.036618062  | 1   | 210 | 0.848429647 | 0.961107197                               | FALSE            | Corrected Model                 | 133.9074722 | 55  | 5880                                                         | 0           | Corrected Model                 | 133.7784885 | 55  | 5880                | 0           | 4856      | -0.000248086 | 0.996365794 | 0.996365794                      | FALSE            | 4856      | -0.000248086 | 0.996365794 | 0.996365794   | FALSE            |  |  |  |  |  |  |
|           |             | 300 oTbx1+/+  | oTbx1+/- | 67           | 0.119402985 | 0.045226142 | 0.358457863       | 1.42881E-15 | 3.63697E-15   | TRUE             | 8.05053552   | 1   | 210 | 0.004994777 | 0.139853743                               | FALSE            | genotype                        | 7.655858881 | 1   | 5880                                                         | 0.005676512 | genotype                        | 0.561757486 | 1   | 5880                | 0.453582974 |           |              |             |                                  |                  |           |              |             |               |                  |  |  |  |  |  |  |
|           |             | 400 oTbx1+/+  | oTbx1+/- | 145          | 0.662068966 | 0.111254037 | 0.56666255        | 6.46568E-19 | 2.78522E-18   | TRUE             | 0.146243949  | 1   | 210 | 0.70253768  | 0.961107197                               | FALSE            | binned_Axon_Diameter            | 246.5223833 | 27  | 5880                                                         | 0           | binned_Axon_Diameter            | 246.5223833 | 27  | 5880                | 0           | 3574.5    | -0.212196465 | 0.00037454  | 0.00524356                       | TRUE             | 3574.5    | -0.212196465 | 0.00037454  | 0.00224724    | TRUE             |  |  |  |  |  |  |
|           |             | 500 oTbx1+/+  | oTbx1+/- | 67           | 1.313432836 | 0.207512627 | 0.771918416       | 7.85361E-09 | 1.25658E-08   | TRUE             | 0.171565279  | 1   | 210 | 0.679147179 | 0.961107197                               | FALSE            | genotype * binned_Axon_Diameter | 6.336275377 | 27  | 5880                                                         | 0           | genotype * binned_Axon_Diameter | 6.336275377 | 27  | 5880                | 0           | 2713      | -0.354680685 | 1.48147E-07 | 4.14811E-06                      | TRUE             | 2713      | -0.354680685 | 1.48147E-07 | 1.77776E-06   | TRUE             |  |  |  |  |  |  |
|           |             | 600 oTbx1+/+  | oTbx1+/- | 145          | 3.04137931  | 0.201497236 | 0.927050591       | 9.02246E-07 | 1.29553E-06   | TRUE             | 0.212196465  | 1   | 210 | 0.20833013  | 0.729155453                               | FALSE            |                                 |             |     |                                                              |             |                                 |             |     |                     |             |           |              |             |                                  |                  |           |              |             |               |                  |  |  |  |  |  |  |
|           |             | 700 oTbx1+/+  | oTbx1+/- | 67           | 4.253731343 | 0.309171785 | 0.915763259       | 0.000238829 | 0.000278634   | TRUE             | 0.2212196465 | 1   | 210 | 0.20833013  | 0.729155453                               | FALSE            |                                 |             |     |                                                              |             |                                 |             |     |                     |             |           |              |             |                                  |                  |           |              |             |               |                  |  |  |  |  |  |  |
|           |             | 800 oTbx1+/+  | oTbx1+/- | 145          | 4.020689655 | 0.224134984 | 0.938970745       | 6.20047E-06 | 8.26729E-06   | TRUE             | 0.2212196465 | 1   | 210 | 0.20833013  | 0.729155453                               | FALSE            |                                 |             |     |                                                              |             |                                 |             |     |                     |             |           |              |             |                                  |                  |           |              |             |               |                  |  |  |  |  |  |  |
|           |             | 900 oTbx1+/+  | oTbx1+/- | 67           | 5.059701493 | 0.405123562 | 0.891388595       | 2.6243E-05  | 3.26579E-05   | TRUE             | 0.2212196465 | 1   | 210 | 0.20833013  | 0.729155453                               | FALSE            |                                 |             |     |                                                              |             |                                 |             |     |                     |             |           |              |             |                                  |                  |           |              |             |               |                  |  |  |  |  |  |  |
|           |             | 1000 oTbx1+/+ | oTbx1+/- | 145          | 3.806896552 | 0.19605705  | 0.943566203       | 1.3749E-05  | 1.79057E-05   | TRUE             | 0.2212196465 | 1   | 210 | 0.20833013  | 0.729155453                               | FALSE            |                                 |             |     |                                                              |             |                                 |             |     |                     |             |           |              |             |                                  |                  |           |              |             |               |                  |  |  |  |  |  |  |
|           |             | 1100 oTbx1+/+ | oTbx1+/- | 67           | 4.865671642 | 0.359591407 | 0.8657092669      | 3.69424E-06 | 5.04579E-06   | TRUE             | 0.2212196465 | 1   | 210 | 0.20833013  | 0.729155453                               | FALSE            |                                 |             |     |                                                              |             |                                 |             |     |                     |             |           |              |             |                                  |                  |           |              |             |               |                  |  |  |  |  |  |  |
|           |             | 1200 oTbx1+/+ | oTbx1+/- | 145          | 3.593103448 | 0.177654081 | 0.944682121       | 1.67654E-05 | 2.13378E-05   | TRUE             | 0.2212196465 | 1   | 210 | 0.20833013  | 0.729155453                               | FALSE            |                                 |             |     |                                                              |             |                                 |             |     |                     |             |           |              |             |                                  |                  |           |              |             |               |                  |  |  |  |  |  |  |
|           |             | 1300 oTbx1+/+ | oTbx1+/- | 67           | 3.220689655 | 0.160658656 | 0.954623818       | 0.000107914 | 0.00128578    | TRUE             | 0.2212196465 | 1   | 210 | 0.20833013  | 0.729155453                               | FALSE            |                                 |             |     |                                                              |             |                                 |             |     |                     |             |           |              |             |                                  |                  |           |              |             |               |                  |  |  |  |  |  |  |
|           |             | 1400 oTbx1+/+ | oTbx1+/- | 145          | 3.014925373 | 0.261758774 | 0.920220673       | 0.000369011 | 0.000421727   | TRUE             | 0.2212196465 | 1   | 210 | 0.20833013  | 0.729155453                               | FALSE            |                                 |             |     |                                                              |             |                                 |             |     |                     |             |           |              |             |                                  |                  |           |              |             |               |                  |  |  |  |  |  |  |
|           |             | 1500 oTbx1+/+ | oTbx1+/- | 67           | 2.432835821 | 0.207528892 | 0.935009897       | 3.20007E-06 | 4.4801E-06    | TRUE             | 0.2212196465 | 1   | 210 | 0.20833013  | 0.729155453                               | FALSE            |                                 |             |     |                                                              |             |                                 |             |     |                     |             |           |              |             |                                  |                  |           |              |             |               |                  |  |  |  |  |  |  |
|           |             | 1600 oTbx1+/+ | oTbx1+/- | 145          | 1.972413793 | 0.103086853 | 0.925580502       | 7.20232E-07 | 1.09008E-06   | TRUE             | 0.2212196465 | 1   | 210 | 0.20833013  | 0.729155453                               | FALSE            |                                 |             |     |                                                              |             |                                 |             |     |                     |             |           |              |             |                                  |                  |           |              |             |               |                  |  |  |  |  |  |  |
|           |             | 1700 oTbx1+/+ | oTbx1+/- | 67           | 1.880597015 | 0.19667336  | 0.894105256       | 3.31308E-05 | 4.03331E-05   | TRUE             | 0.2212196465 | 1   | 210 | 0.20833013  | 0.729155453                               | FALSE            |                                 |             |     |                                                              |             |                                 |             |     |                     |             |           |              |             |                                  |                  |           |              |             |               |                  |  |  |  |  |  |  |
|           |             | 1800 oTbx1+/+ | oTbx1+/- | 145          | 1.448275862 | 0.097345533 | 0.886540353       | 3.87729E-09 | 6.38613E-09   | TRUE             | 0.2212196465 | 1   | 210 | 0.20833013  | 0.729155453                               | FALSE            |                                 |             |     |                                                              |             |                                 |             |     |                     |             |           |              |             |                                  |                  |           |              |             |               |                  |  |  |  |  |  |  |
|           |             | 1900 oTbx1+/+ | oTbx1+/- | 67           | 0.970149254 | 0.114467183 | 0.829086244       | 2.4814E-07  | 3.85995E-07   | TRUE             | 0.2212196465 | 1   | 210 | 0.20833013  | 0.729155453                               | FALSE            |                                 |             |     |                                                              |             |                                 |             |     |                     |             |           |              |             |                                  |                  |           |              |             |               |                  |  |  |  |  |  |  |
|           |             | 2000 oTbx1+/+ | oTbx1+/- | 145          | 1.144827586 | 0.093351451 | 0.832913399       | 1.46897E-11 | 2.65362E-11   | TRUE             | 0.2212196465 | 1   | 210 | 0.20833013  | 0.729155453                               | FALSE            |                                 |             |     |                                                              |             |                                 |             |     |                     |             |           |              |             |                                  |                  |           |              |             |               |                  |  |  |  |  |  |  |
|           |             | 2100 oTbx1+/+ | oTbx1+/- | 67           | 1.029850746 | 0.112474228 | 0.847671866       | 8.85128E-07 | 1.29553E-06   | TRUE             | 0.2212196465 | 1   | 210 | 0.20833013  | 0.729155453                               | FALSE            |                                 |             |     |                                                              |             |                                 |             |     |                     |             |           |              |             |                                  |                  |           |              |             |               |                  |  |  |  |  |  |  |
|           |             | 2200 oTbx1+/+ | oTbx1+/- | 145          | 0.910344828 | 0.080656574 | 0.778914571       | 1.6278E-13  | 3.37617E-13   | TRUE             | 0.2212196465 | 1   | 210 | 0.20833013  | 0.729155453                               | FALSE            |                                 |             |     |                                                              |             |                                 |             |     |                     |             |           |              |             |                                  |                  |           |              |             |               |                  |  |  |  |  |  |  |
|           |             | 2300 oTbx1+/+ | oTbx1+/- | 67           | 0.656716418 | 0.113638558 | 0.720096111       | 5.37756E-10 | 9.12555E-10   | TRUE             | 0.2212196465 | 1   | 210 | 0.20833013  | 0.729155453                               | FALSE            |                                 |             |     |                                                              |             |                                 |             |     |                     |             |           |              |             |                                  |                  |           |              |             |               |                  |  |  |  |  |  |  |
|           |             | 2400 oTbx1+/+ | oTbx1+/- | 145          | 0.537931034 | 0.067820962 | 0.664089799       | 9.36116E-17 | 2.66433E-16   | TRUE             | 0.2212196465 | 1   | 210 | 0.20833013  | 0.729155453                               | FALSE            |                                 |             |     |                                                              |             |                                 |             |     |                     |             |           |              |             |                                  |                  |           |              |             |               |                  |  |  |  |  |  |  |
|           |             | 2500 oTbx1+/+ | oTbx1+/- | 67           | 0.47761194  | 0.104961083 | 0.599906087       | 3.1492E-12  | 6.08121E-12   | TRUE             | 0.2212196465 | 1   | 210 | 0.20833013  | 0.729155453                               | FALSE            |                                 |             |     |                                                              |             |                                 |             |     |                     |             |           |              |             |                                  |                  |           |              |             |               |                  |  |  |  |  |  |  |
|           |             | 2600 oTbx1+/+ | oTbx1+/- | 145          | 0.372413793 | 0.050802777 | 0.625598192       | 1.17036E-17 | 3.8677E-17    | TRUE             | 0.2212196465 | 1   | 210 | 0.20833013  | 0.729155453                               | FALSE            |                                 |             |     |                                                              |             |                                 |             |     |                     |             |           |              |             |                                  |                  |           |              |             |               |                  |  |  |  |  |  |  |
|           |             | 2700 oTbx1+/+ | oTbx1+/- | 67           | 0.373134328 | 0.070006205 | 0.64398396        | 1.80164E-11 | 3.15287E-11   | TRUE             | 0.2212196465 | 1   | 210 | 0.20833013  | 0.729155453                               | FALSE            |                                 |             |     |                                                              |             |                                 |             |     |                     |             |           |              |             |                                  |                  |           |              |             |               |                  |  |  |  |  |  |  |
|           |             | 2800 oTbx1+/+ | oTbx1+/- | 145          | 0.317241379 | 0.042326328 | 0.607726872       | 4.70168E-18 | 1.7553E-17    | TRUE             | 0.2212196465 | 1   | 210 | 0.20833013  | 0.729155453                               | FALSE            |                                 |             |     |                                                              |             |                                 |             |     |                     |             |           |              |             |                                  |                  |           |              |             |               |                  |  |  |  |  |  |  |
|           |             | 2900 oTbx1+/+ | oTbx1+/- | 67           | 0.343283582 | 0.072283423 | 0.60768044        | 4.24081E-12 | 7.91618E-12   | TRUE             | 0.2212196465 | 1   | 210 | 0.20833013  | 0.729155453                               | FALSE            |                                 |             |     |                                                              |             |                                 |             |     |                     |             |           |              |             |                                  |                  |           |              |             |               |                  |  |  |  |  |  |  |
|           |             | 3000 oTbx1+/+ | oTbx1+/- | 145          | 0.262068966 | 0.045926697 | 0.525665522       | 1.0219E-19  | 4.76887E-19   | TRUE             | 0.2212196465 | 1   | 210 | 0.20833013  | 0.729155453                               | FALSE            |                                 |             |     |                                                              |             |                                 |             |     |                     |             |           |              |             |                                  |                  |           |              |             |               |                  |  |  |  |  |  |  |
|           |             | 3100 oTbx1+/+ | oTbx1+/- | 67           | 0.164179104 | 0.050313423 | 0.439795375       | 1.44797E-14 | 3.24346E-14   | TRUE             | 0.2212196465 | 1   | 210 | 0.20833013  | 0.729155453                               | FALSE            |                                 |             |     |                                                              |             |                                 |             |     |                     |             |           |              |             |                                  |                  |           |              |             |               |                  |  |  |  |  |  |  |
|           |             | 3200 oTbx1+/+ | oTbx1+/- | 145          | 0.124137931 | 0.029169144 | 0.382323027       | 3.6823E-22  | 2.06209E-21   | TRUE             | 0.2212196465 | 1   | 210 | 0.20833013  | 0.729155453                               | FALSE            |                                 |             |     |                                                              |             |                                 |             |     |                     |             |           |              |             |                                  |                  |           |              |             |               |                  |  |  |  |  |  |  |
|           |             | 3300 oTbx1+/+ | oTbx1+/- | 67           | 0.179104478 | 0.05176825  | 0.462751687       | 2.90876E-14 | 6.26502E-14   | TRUE             | 0.2212196465 | 1   | 210 | 0.20833013  | 0.729155453                               | FALSE            |                                 |             |     |                                                              |             |                                 |             |     |                     |             |           |              |             |                                  |                  |           |              |             |               |                  |  |  |  |  |  |  |
|           |             | 3400 oTbx1+/+ | oTbx1+/- | 145          | 0.151724138 | 0.032944622 | 0.41921103        | 1.4113E-21  | 7.1848E-21    | TRUE             | 0.2212196465 | 1   | 210 | 0.20833013  | 0.729155453                               | FALSE            |                                 |             |     |                                                              |             |                                 |             |     |                     |             |           |              |             |                                  |                  |           |              |             |               |                  |  |  |  |  |  |  |
|           |             | 3500 oTbx1+/+ | oTbx1+/- | 67           | 0.134328358 | 0.041974785 | 0.403025091       | 4.94005E-15 | 1.15268E-14   | TRUE             | 0.2212196465 | 1   | 210 | 0.20833013  | 0.729155453                               | FALSE            |                                 |             |     |                                                              |             |                                 |             |     |                     |             |           |              |             |                                  |                  |           |              |             |               |                  |  |  |  |  |  |  |
|           |             | 3600 oTbx1+/+ | oTbx1+/- | 145          | 0.096551724 | 0.026486709 | 0.326505065       | 5.39777E-23 | 3.77844E-22   | TRUE             | 0.2212196465 | 1   | 210 | 0.          |                                           |                  |                                 |             |     |                                                              |             |                                 |             |     |                     |             |           |              |             |                                  |                  |           |              |             |               |                  |  |  |  |  |  |  |

| Figure    | Chi squared test |             |     |          | Kolmogorov-Smirnov test |          |
|-----------|------------------|-------------|-----|----------|-------------------------|----------|
|           | # of samples     | Statistic   | dof | p_value  | Distance                | p_value  |
| Figure 9D | 6740             | 109.7085231 | 27  | 6.22E-12 | 0.108947998             | 3.59E-16 |

| Figure    | Measurement | PND | Genotype | # of Samples | Average     | s.e.m       | Shapiro-Wilk test |             |               |                 | Levene test |     |     |             |               | Mann-Witney U test |          |          |           |              |             |               |                 |
|-----------|-------------|-----|----------|--------------|-------------|-------------|-------------------|-------------|---------------|-----------------|-------------|-----|-----|-------------|---------------|--------------------|----------|----------|-----------|--------------|-------------|---------------|-----------------|
|           |             |     |          |              |             |             | Statistic         | p_value     | p_adj(FDR BH) | Rejects(FDR 5%) | Statistic   | df1 | df2 | p_value     | p_adj(FDR BH) | Rejects(FDR 5%)    | Sample1  | Sample2  | Statistic | R (Z score)  | p_value     | p_adj(FDR BH) | Rejects(FDR 5%) |
| Figure S1 | Weight      | P8  | oTbx1+/+ | 27           | 4.6         | 0.125064086 | 0.922948078       | 0.046515575 | 0.186062298   | FALSE           | 0.639894198 | 1   | 36  | 0.428996273 | 0.428996273   | FALSE              | oTbx1+/+ | oTbx1+/- | 140       | 0.044382036  | 0.799797921 | 0.91732983    | FALSE           |
|           |             |     | oTbx1+/- | 11           | 4.454545455 | 0.237931861 | 0.980904629       | 0.970981671 | 0.970981671   | FALSE           |             |     |     |             |               |                    | oTbx1+/+ | oTbx1+/- | 153       | 0.115996334  | 0.465855659 | 0.91732983    | FALSE           |
|           |             | P12 | oTbx1+/+ | 30           | 6.54        | 0.155482194 | 0.986169448       | 0.955380174 | 0.970981671   | FALSE           | 1.973777187 | 1   | 40  | 0.167766267 | 0.428996273   | FALSE              | oTbx1+/+ | oTbx1+/- | 135.5     | -0.067878408 | 0.703523286 | 0.91732983    | FALSE           |
|           |             |     | oTbx1+/- | 12           | 6.225       | 0.351861931 | 0.915390828       | 0.249993706 | 0.499987413   | FALSE           |             |     |     |             |               |                    | oTbx1+/+ | oTbx1+/- | 102       | 0.022769128  | 0.91732983  | 0.91732983    | FALSE           |
|           |             | 1M  | oTbx1+/+ | 27           | 16.15925926 | 0.252241194 | 0.863150358       | 0.002121269 | 0.016970151   | TRUE            | 0.856989714 | 1   | 36  | 0.360747027 | 0.428996273   | FALSE              | oTbx1+/+ | oTbx1+/- | 102       | 0.022769128  | 0.91732983  | 0.91732983    | FALSE           |
|           |             |     | oTbx1+/- | 11           | 16.37272727 | 0.447232075 | 0.942333972       | 0.548313562 | 0.80806296    | FALSE           |             |     |     |             |               |                    | oTbx1+/+ | oTbx1+/- | 102       | 0.022769128  | 0.91732983  | 0.91732983    | FALSE           |
|           |             | 2M  | oTbx1+/+ | 21           | 23.78571429 | 0.385837723 | 0.943028092       | 0.24996769  | 0.499987413   | FALSE           | 1.523319488 | 1   | 29  | 0.227026429 | 0.428996273   | FALSE              | oTbx1+/+ | oTbx1+/- | 102       | 0.022769128  | 0.91732983  | 0.91732983    | FALSE           |
|           |             |     | oTbx1+/- | 10           | 23.53       | 0.736515822 | 0.94467026        | 0.60604722  | 0.80806296    | FALSE           |             |     |     |             |               |                    | oTbx1+/+ | oTbx1+/- | 102       | 0.022769128  | 0.91732983  | 0.91732983    | FALSE           |

| Measurement | PND | Genotype      | # of Samples | Average     | s.e.m       | Shapiro-Wilk test |             |               |                 | Levene test |     |     |             |               | Mann-Witney U test |               |               |           |              |             |               |                 |
|-------------|-----|---------------|--------------|-------------|-------------|-------------------|-------------|---------------|-----------------|-------------|-----|-----|-------------|---------------|--------------------|---------------|---------------|-----------|--------------|-------------|---------------|-----------------|
|             |     |               |              |             |             | Statistic         | p_value     | p_adj(FDR BH) | Rejects(FDR 5%) | Statistic   | df1 | df2 | p_value     | p_adj(FDR BH) | Rejects(FDR 5%)    | Sample1       | Sample2       | Statistic | R (Z score)  | p_value     | p_adj(FDR BH) | Rejects(FDR 5%) |
| Weight      | P8  | PdgfraCre;WT  | 8            | 4.35        | 0.205287255 | 0.866045239       | 0.137839188 | 0.413517564   | FALSE           | 0.127476314 | 2   | 24  | 0.880906332 | 0.880906332   | FALSE              | PdgfraCre;WT  | WT;Tbx1+/flox | 18        | -0.367573522 | 0.160528361 | 0.872562731   | FALSE           |
|             |     | WT;Tbx1+/flox | 8            | 4.7375      | 0.203485257 | 0.753919531       | 0.009024632 | 0.054147793   | FALSE           |             |     |     |             |               |                    | PdgfraCre;WT  | WT;WT         | 29.5      | -0.274679021 | 0.272287052 | 0.872562731   | FALSE           |
|             |     | WT;WT         | 11           | 4.681818182 | 0.225153758 | 0.91199385        | 0.257472583 | 0.617934199   | FALSE           |             |     |     |             |               |                    | WT;Tbx1+/flox | WT;WT         | 40.5      | -0.066301833 | 0.840385277 | 1             | FALSE           |
|             | P12 | PdgfraCre;WT  | 9            | 6.477777778 | 0.227777778 | 0.921953577       | 0.408659184 | 0.700558602   | FALSE           | 1.743649374 | 2   | 27  | 0.194001478 | 0.776005912   | FALSE              | PdgfraCre;WT  | WT;Tbx1+/flox | 30.5      | -0.20813018  | 0.436281366 | 0.872562731   | FALSE           |
|             |     | WT;Tbx1+/flox | 9            | 6.788888889 | 0.217590623 | 0.947010301       | 0.657291765 | 0.876389021   | FALSE           |             |     |     |             |               |                    | PdgfraCre;WT  | WT;WT         | 52.5      | 0.023262105  | 0.97227231  | 1             | FALSE           |
|             |     | WT;WT         | 12           | 6.4         | 0.31454633  | 0.994973684       | 0.999999306 | 0.999999306   | FALSE           |             |     |     |             |               |                    | WT;Tbx1+/flox | WT;WT         | 42        | 0.186096842  | 0.422107304 | 0.872562731   | FALSE           |
|             | 1M  | PdgfraCre;WT  | 8            | 16.3625     | 0.287189273 | 0.934767327       | 0.560437988 | 0.840656982   | FALSE           | 0.176982173 | 2   | 24  | 0.838878203 | 0.880906332   | FALSE              | PdgfraCre;WT  | WT;Tbx1+/flox | 31        | 0.116690007  | 0.672974085 | 1             | FALSE           |
|             |     | WT;Tbx1+/flox | 9            | 15.78888889 | 0.590537525 | 0.763341553       | 0.007737799 | 0.054147793   | FALSE           |             |     |     |             |               |                    | PdgfraCre;WT  | WT;WT         | 40        | 0            | 1           | 1             | FALSE           |
|             |     | WT;WT         | 10           | 16.33       | 0.381240665 | 0.925384317       | 0.404055022 | 0.700558602   | FALSE           |             |     |     |             |               |                    | WT;Tbx1+/flox | WT;WT         | 42        | -0.056195149 | 0.842105263 | 1             | FALSE           |
|             | 2M  | PdgfraCre;WT  | 8            | 24.3875     | 0.578309575 | 0.794950867       | 0.025269633 | 0.101078534   | FALSE           | 0.889390233 | 2   | 18  | 0.428210148 | 0.856420296   | FALSE              | PdgfraCre;WT  | WT;Tbx1+/flox | 26        | 0.05976143   | 0.866511267 | 1             | FALSE           |
|             |     | WT;Tbx1+/flox | 7            | 23.91428571 | 0.525279323 | 0.958737507       | 0.807832827 | 0.969399392   | FALSE           |             |     |     |             |               |                    | PdgfraCre;WT  | WT;WT         | 14.5      | 0.327781141  | 0.282384282 | 0.872562731   | FALSE           |
|             |     | WT;WT         | 6            | 22.83333333 | 0.889818958 | 0.974279891       | 0.919850787 | 0.999999306   | FALSE           |             |     |     |             |               |                    | WT;Tbx1+/flox | WT;WT         | 14        | 0.277350098  | 0.365967366 | 0.872562731   | FALSE           |

\*including P11 and P13

\*\*At the beginning of the behavioral battery (RSI) at each age

| Figure    | Measurement           | Genotype | # of Samples | Average     | s.e.m       | Shapiro-Wilk test |          | Levene test |     |      |                        | Linear Mixed Model |             |      |             | Measurement | Fisher's r-to-Z transformation               |      |             |                       |                           |              |                       |
|-----------|-----------------------|----------|--------------|-------------|-------------|-------------------|----------|-------------|-----|------|------------------------|--------------------|-------------|------|-------------|-------------|----------------------------------------------|------|-------------|-----------------------|---------------------------|--------------|-----------------------|
|           |                       |          |              |             |             | Statistic         | p_value  | Statistic   | df1 | df2  | p_value                | factor             | F           | df1  | df2         |             | p_value                                      | N    | Pearson's r | p_value (correlation) | Z transformed correlation | Z statistic  | p_value (Z statistic) |
| Figure S2 | myelin thickness (nm) | oTbx1+/+ | 4423         | 298.4267488 | 1.598178651 | 0.883548319       | 0.00E+00 | 18.9486008  | 1   | 6738 | 1.36273E-05            | Genotype           | 0.007407354 | 1    | 6736        | 0.931416522 | myelin thickness vs Axon Diameter (oTbx1+/+) | 4423 | 0.309679    | 6.35E-99              | 0.320189803               | -2.190862775 | 0.028461724           |
|           |                       | oTbx1+/- | 2317         | 281.3171899 | 1.943145919 | 0.89264971        | 1.85E-37 |             |     |      |                        | Axon Diameter      | 755.8280666 | 1    | 6736        | 0           | myelin thickness vs Axon Diameter (oTbx1+/-) | 2317 | 0.359582    | 1.15E-71              | 0.376405671               |              |                       |
|           |                       |          |              |             |             |                   |          |             |     |      | Genotype:Axon Diameter | 0.05543768         | 1           | 6736 | 0.813865028 |             |                                              |      |             |                       |                           |              |                       |
